# Supplementary material for: Proteomic Analysis Reveals a Mitochondrial Remodeling of βTC3 Cells in Response to Nanotopography
Source: Front Cell Dev Biol. 2020 Jul 29;8:508. doi: 10.3389/fcell.2020.00508 (PMC7405422; doi:10.3389/fcell.2020.00508)
Supplement: TABLE S2 — Proteins down regulated in mitochondria of cells grown on ns-ZrOx or exclusively expressed on Glass in the comparison ns-ZrOx vs Glass. Proteins were considered differentially expressed if they were present only in one condition or showed a statistically significant difference (t-test p ≤ 0.05). [file Table_2.xls]

## Sheet: Foglio1
Table S2. Glass vs ns-ZrOx. Mitochondrial proteins down-regulated in ns-ZrOx or present only in Glass
MITOMINER TRUE	Razor + unique peptides	MS/MS count	Student's T-test Difference 15nm_CTR	Protein IDs	Majority protein IDs	Protein names	Gene names
+	2	9	-1.9638	P23284	P23284	Peptidyl-prolyl cis-trans isomerase B	PPIB
+	2	8	-1.90364	Q5TI65;A0A087WVZ0;Q9Y5U8	Q5TI65;A0A087WVZ0;Q9Y5U8	Mitochondrial pyruvate carrier 1	BRP44L,MPC1
+	3	5	-1.79115	P27338	P27338	Amine oxidase [flavin-containing] B	MAOB
+	5	23	-1.7192	A0A0D9SFP2;E9PF18;Q16836;A0A0A0MSE2;A0A1W2PQ78;A0A1W2PNM1;A0A1W2PQ55;A0A1W2PP40;A0A1W2PQC2;A0A1W2PRT2;A0A1W2PQV5	A0A0D9SFP2;E9PF18;Q16836;A0A0A0MSE2;A0A1W2PQ78;A0A1W2PNM1	Hydroxyacyl-coenzyme A dehydrogenase, mitochondrial	HADH
+	4	11	-1.61317	P05387;H0YDD8	P05387;H0YDD8	60S acidic ribosomal protein P2	RPLP2
+	3	18	-1.59491	O95716	O95716	Ras-related protein Rab-3D	RAB3D
+	4	10	-1.45853	E9PEX6;P09622;F8WDM5;A0A1W2PR83;F2Z2E3	E9PEX6;P09622	Dihydrolipoyl dehydrogenase;Dihydrolipoyl dehydrogenase, mitochondrial	DLD
+	4	26	-1.37459	E7EPT4;P19404	E7EPT4;P19404	NADH dehydrogenase [ubiquinone] flavoprotein 2, mitochondrial	NDUFV2
+	6	29	-1.35344	P31689	P31689	DnaJ homolog subfamily A member 1	DNAJA1
+	3	13	-1.33859	P30044	P30044	Peroxiredoxin-5, mitochondrial	PRDX5
+	2	10	-1.25692	F5H6X6;E9PKU7;Q14697;E9PNH1	F5H6X6;E9PKU7;Q14697;E9PNH1	Neutral alpha-glucosidase AB	GANAB
+	5	19	-1.24208	P11177;C9J634;F8WF02	P11177;C9J634	Pyruvate dehydrogenase E1 component subunit beta, mitochondrial	PDHB
+	5	10	-1.21631	P53597;H7C233	P53597	Succinyl-CoA ligase [ADP/GDP-forming] subunit alpha, mitochondrial	SUCLG1
+	2	7	-1.19197	Q13162;H7C3T4;A6NG45	Q13162;H7C3T4	Peroxiredoxin-4	PRDX4
+	7	29	-1.18882	O95831;E9PMA0	O95831;E9PMA0	Apoptosis-inducing factor 1, mitochondrial	AIFM1
+	13	79	-1.17621	P27797;K7EJB9;K7EL50	P27797;K7EJB9	Calreticulin	CALR
+	2	6	-1.1683	Q9Y2R0	Q9Y2R0	Cytochrome c oxidase assembly factor 3 homolog, mitochondrial	COA3
+	10	52	-1.09589	P62249;M0R210;M0R3H0;Q6IPX4;M0R1M5;M0QX76	P62249;M0R210;M0R3H0;Q6IPX4;M0R1M5	40S ribosomal protein S16	RPS16
+	3	16	-1.08295	A0A0A0MT83;P26440;H0YKV0;H0YN10;A0A087WVD3;H7C4G6	A0A0A0MT83;P26440	Isovaleryl-CoA dehydrogenase, mitochondrial	IVD
+	14	109	-1.07779	P05141;Q9H0C2	P05141	ADP/ATP translocase 2;ADP/ATP translocase 2, N-terminally processed	SLC25A5
+	8	26	-1.07182	A0A0D9SFS3;E9PDF2;E9PCR7;Q02218;E9PFG7;C9J4G7	A0A0D9SFS3;E9PDF2;E9PCR7;Q02218;E9PFG7	2-oxoglutarate dehydrogenase, mitochondrial	OGDH
+	5	20	-1.06828	P62829;C9JD32;J3KT29;J3KTJ3;J3QQT9;B9ZVP7	P62829;C9JD32;J3KT29;J3KTJ3	60S ribosomal protein L23	RPL23
+	3	11	-1.06164	I3L0K7;Q12931;I3L239	I3L0K7;Q12931	Heat shock protein 75 kDa, mitochondrial	TRAP1
+	2	6	-1.05927	S4R3N9;A0A0A0MS41;A0A1P0AYU5;Q9BWM7	S4R3N9;A0A0A0MS41;A0A1P0AYU5;Q9BWM7	Sideroflexin;Sideroflexin-3	SFXN3
+	3	11	-1.00959	Q9UI09;F8VRD8	Q9UI09	NADH dehydrogenase [ubiquinone] 1 alpha subcomplex subunit 12	NDUFA12
+	14	110	-1.0067	P30101	P30101	Protein disulfide-isomerase A3	PDIA3
+	5	13	-0.999745	Q9Y512	Q9Y512	Sorting and assembly machinery component 50 homolog	SAMM50
+	1	5	-0.991739	P00403	P00403	Cytochrome c oxidase subunit 2	MT-CO2
+	7	35	-0.989164	H0YL72;P50213;H0YLI6;H0YKD0;H0YMU3;H0YM64	H0YL72;P50213;H0YLI6;H0YKD0;H0YMU3	Isocitrate dehydrogenase [NAD] subunit alpha, mitochondrial	IDH3A
+	40	415	-0.977708	P11021	P11021	78 kDa glucose-regulated protein	HSPA5
+	6	46	-0.96859	B4DJV2;O75390;A0A0C4DGI3;F8VTT8;F8W4S1;H0YH82;F8W642;F8VZK9;F8VX07;F8VRP1;F8VX68;H0YIC4;F8VPF9;F8VPA1;F8W1S4;F8VU34	B4DJV2;O75390;A0A0C4DGI3;F8VTT8;F8W4S1;H0YH82	Citrate synthase;Citrate synthase, mitochondrial	CS
+	9	45	-0.954496	P46777;A0A2R8Y6J3;A0A2R8Y4A2;R4GNJ2;Q5T7N0	P46777;A0A2R8Y6J3	60S ribosomal protein L5	RPL5
+	16	121	-0.942452	P07237;H7BZ94;H0Y3Z3;I3L0S0;I3L3U6;I3L398;I3NI03;I3L312;I3L514;I3L3P5;I3L4M2	P07237;H7BZ94;H0Y3Z3	Protein disulfide-isomerase	P4HB
+	5	17	-0.941974	A0A087WZN1;O43837;A0A087X2E5;A0A0D9SG66	A0A087WZN1;O43837;A0A087X2E5	Isocitrate dehydrogenase [NAD] subunit, mitochondrial;Isocitrate dehydrogenase [NAD] subunit beta, mitochondrial	IDH3B
+	26	143	-0.936183	P14625;H0YIV0;Q96GW1;A0A1W2PRR1;Q58FF3;F8W026	P14625	Endoplasmin	HSP90B1
+	3	17	-0.921784	P30048	P30048	Thioredoxin-dependent peroxide reductase, mitochondrial	PRDX3
+	20	112	-0.919495	P61978;Q5T6W2;S4R359;S4R457	P61978;Q5T6W2	Heterogeneous nuclear ribonucleoprotein K	HNRNPK
+	3	15	-0.907942	Q9P0J0;B4DEZ3;K7EJE1;E7ENQ6;K7EP87	Q9P0J0;B4DEZ3;K7EJE1;E7ENQ6	NADH dehydrogenase [ubiquinone] 1 alpha subcomplex subunit 13	NDUFA13
+	11	40	-0.901887	P08559;Q5JPU3;P29803;Q5JPU2;Q5JPU0;Q5JPT9;Q5JPU1	P08559	Pyruvate dehydrogenase E1 component subunit alpha, somatic form, mitochondrial	PDHA1
+	2	8	-0.887646	Q16134;D6RAD5	Q16134;D6RAD5	Electron transfer flavoprotein-ubiquinone oxidoreductase, mitochondrial	ETFDH
+	6	27	-0.885597	Q9Y277;E5RFP6;E5RJN6;E5RHZ6;E5RFL1;E5RHE1;E5RK27	Q9Y277	Voltage-dependent anion-selective channel protein 3	VDAC3
+	5	30	-0.882534	P26885;F5H0N4	P26885	Peptidyl-prolyl cis-trans isomerase FKBP2	FKBP2
+	13	92	-0.870288	P40926;G3XAL0	P40926;G3XAL0	Malate dehydrogenase, mitochondrial;Malate dehydrogenase	MDH2
+	10	40	-0.869141	P09874;Q5VX84;Q5VX85	P09874	Poly [ADP-ribose] polymerase 1	PARP1
+	4	16	-0.864454	Q9H857;H7C519	Q9H857;H7C519	5-nucleotidase domain-containing protein 2	NT5DC2
+	6	42	-0.861582	P62906	P62906	60S ribosomal protein L10a	RPL10A
+	11	72	-0.857198	P63244;D6RHH4;J3KPE3;D6RFZ9;H0YAF8;D6RAU2;E9PD14;D6RFX4;D6R9Z1;H0Y8W2;D6R9L0;D6RAC2;D6RBD0;H0YAM7;D6REE5;D6RGK8;D6RF23;D6R909;H0Y9P0;D6RHJ5;D6RDI0;H0Y8R5	P63244;D6RHH4;J3KPE3;D6RFZ9;H0YAF8;D6RAU2;E9PD14;D6RFX4;D6R9Z1;H0Y8W2;D6R9L0;D6RAC2	Guanine nucleotide-binding protein subunit beta-2-like 1;Guanine nucleotide-binding protein subunit beta-2-like 1, N-terminally processed	GNB2L1
+	1	5	-0.837462	P54136	P54136	Arginine--tRNA ligase, cytoplasmic	RARS
+	10	56	-0.835072	Q02878;F8VZ45;U3KQR5;F8VR69;F8VZA3;F8VWR1;F8VU16	Q02878;F8VZ45;U3KQR5	60S ribosomal protein L6	RPL6
+	11	54	-0.831501	P49411	P49411	Elongation factor Tu, mitochondrial	TUFM
+	10	50	-0.831026	P62917;E9PP36;E9PKU4;E9PKZ0;G3V1A1	P62917;E9PP36;E9PKU4;E9PKZ0	60S ribosomal protein L8	RPL8
+	27	242	-0.80937	P10809;E7EXB4;E7ESH4;C9JL25;C9JCQ4;C9JL19;C9J0S9	P10809	60 kDa heat shock protein, mitochondrial	HSPD1
+	16	68	-0.807708	J3KPX7;Q99623;F5GY37;F5GWA7;F5H3X6;F5H0C5;F5H2D2;U3KPZ5	J3KPX7;Q99623;F5GY37;F5GWA7;F5H3X6	Prohibitin-2	PHB2
+	2	6	-0.800605	Q56VL3	Q56VL3	OCIA domain-containing protein 2	OCIAD2
+	4	13	-0.800109	Q9HAV7	Q9HAV7	GrpE protein homolog 1, mitochondrial	GRPEL1
+	2	5	-0.793781	O76031	O76031	ATP-dependent Clp protease ATP-binding subunit clpX-like, mitochondrial	CLPX
+	4	17	-0.778669	Q14165;F5H1S8;H0YG07;F5GX14	Q14165;F5H1S8;H0YG07;F5GX14	Malectin	MLEC
+	1	10	-0.766573	P61026;A0A2R8YDI9;H0YLJ8;H0YL94;G3V196;A0A2R8YFB8;P59190	P61026;A0A2R8YDI9;H0YLJ8;H0YL94;G3V196;A0A2R8YFB8;P59190	Ras-related protein Rab-10;Ras-related protein Rab-15	RAB10, RAB8B , RAB15
+	8	59	-0.764281	A0A2R8Y811;P62263;E5RH77	A0A2R8Y811;P62263;E5RH77	40S ribosomal protein S14	RPS14
+	4	9	-0.740309	H0YM31;Q16822;A0A0A0MS74;H0YNG4;H0YMA5;H0YML5	H0YM31;Q16822;A0A0A0MS74	Phosphoenolpyruvate carboxykinase [GTP], mitochondrial	PCK2
+	6	17	-0.736565	E9PCX7;Q13423	E9PCX7;Q13423	NAD(P) transhydrogenase, mitochondrial	NNT
+	2	5	-0.718358	Q9HD20;H7C3H2	Q9HD20;H7C3H2	Manganese-transporting ATPase 13A1	ATP13A1
+	3	8	-0.715248	O75947	O75947	ATP synthase subunit d, mitochondrial	ATP5H
+	10	82	-0.71402	H0YK49;P13804;H0YNX6;H0YL12;H0YLU7;H0YL83;H0YKF0;H0YM12	H0YK49;P13804;H0YNX6;H0YL12;H0YLU7	Electron transfer flavoprotein subunit alpha, mitochondrial	ETFA
+	5	37	-0.708603	P38117;M0QY67	P38117;M0QY67	Electron transfer flavoprotein subunit beta	ETFB
+	12	76	-0.699015	P48735;H0YL11	P48735	Isocitrate dehydrogenase [NADP], mitochondrial	IDH2
+	15	90	-0.696596	P62241;Q5JR95	P62241;Q5JR95	40S ribosomal protein S8	RPS8
+	12	71	-0.695099	P54886	P54886	Delta-1-pyrroline-5-carboxylate synthase;Glutamate 5-kinase;Gamma-glutamyl phosphate reductase	ALDH18A1
+	19	105	-0.68962	P43304;F5GYK7	P43304	Glycerol-3-phosphate dehydrogenase, mitochondrial	GPD2
+	10	30	-0.686854	G3V0I5;P49821;B4DE93;E9PLC6;E9PQP1;E9PMX3;E9PJL9;H0YE81;E9PPS5;E9PPR0;H0YD04;E9PPD6	G3V0I5;P49821;B4DE93;E9PLC6;E9PQP1;E9PMX3	NADH dehydrogenase [ubiquinone] flavoprotein 1, mitochondrial	NDUFV1
+	1	1	-0.670194	P14854	P14854	Cytochrome c oxidase subunit 6B1	COX6B1
+	8	39	-0.654216	P04844	P04844	Dolichyl-diphosphooligosaccharide--protein glycosyltransferase subunit 2	RPN2
+	27	167	-0.647066	P38646;H0Y8S0;D6RA73;D6RJI2;A0A3B3ITI4;H0YBG6;A0A3B3ITN1	P38646	Stress-70 protein, mitochondrial	HSPA9
+	9	59	-0.614124	P00367;P49448	P00367;P49448	Glutamate dehydrogenase 1, mitochondrial;Glutamate dehydrogenase 2, mitochondrial	GLUD1, GLUD2
+	3	18	-0.612839	P61088;F8VZ29;F8VSD4;F8VV71;Q5JXB2;F8VQQ8	P61088;F8VZ29;F8VSD4;F8VV71;Q5JXB2	Ubiquitin-conjugating enzyme E2 N;Putative ubiquitin-conjugating enzyme E2 N-like	UBE2N, UBE2NL
+	3	11	-0.610943	O00483	O00483	Cytochrome c oxidase subunit NDUFA4	NDUFA4
+	2	12	-0.598127	P49207	P49207	60S ribosomal protein L34	RPL34
+	3	16	-0.594398	P24534	P24534	Elongation factor 1-beta	EEF1B2
+	3	15	-0.586906	Q96HS1;F5GXG4	Q96HS1;F5GXG4	Serine/threonine-protein phosphatase PGAM5, mitochondrial	PGAM5
+	5	12	-0.586557	O95292;E5RK64	O95292;E5RK64	Vesicle-associated membrane protein-associated protein B/C	VAPB
+	16	79	-0.585369	B9A067;Q16891;C9J406;H7C463;A0A087WYS0;D6RAW4	B9A067;Q16891;C9J406;H7C463	MICOS complex subunit MIC60	IMMT
+	2	6	-0.567513	F5H702;F5H8D0;Q96GC5	F5H702;F5H8D0;Q96GC5	39S ribosomal protein L48, mitochondrial	MRPL48
+	4	23	-0.539947	F8W1R7;J3KND3;G8JLA2;G3V1V0;B7Z6Z4;P60660;G3V1Y7;F8VPF3;F8VZU9;F8W180;F8VXL3;H0YI43;F8W1I5;P14649	F8W1R7;J3KND3;G8JLA2;G3V1V0;B7Z6Z4;P60660;G3V1Y7;F8VPF3;F8VZU9;F8W180	Myosin light polypeptide 6	MYL6
+	4	13	-0.529519	O75306	O75306	NADH dehydrogenase [ubiquinone] iron-sulfur protein 2, mitochondrial	NDUFS2
+	2	9	-0.523029	O95202	O95202	LETM1 and EF-hand domain-containing protein 1, mitochondrial	LETM1
+	6	46	-0.522953	P49755;G3V2K7	P49755	Transmembrane emp24 domain-containing protein 10	TMED10
+	8	50	-0.502152	P62269;J3JS69;A0A0G2JQH2;Q5GGW2	P62269;J3JS69	40S ribosomal protein S18	RPS18
+	5	31	-0.490493	Q9BSJ8;F8VZB1	Q9BSJ8	Extended synaptotagmin-1	ESYT1
+	28	423	-0.488079	P06576;H0YH81;F8W079;H0YI37	P06576;H0YH81;F8W079	ATP synthase subunit beta, mitochondrial;ATP synthase subunit beta	ATP5B
+	16	106	-0.481684	P21796;C9JI87	P21796;C9JI87	Voltage-dependent anion-selective channel protein 1	VDAC1
+	12	63	-0.469965	C9JRZ6;F8WAR4;Q9NX63;A0A286YEX5	C9JRZ6;F8WAR4;Q9NX63	MICOS complex subunit MIC19	CHCHD3
+	1	16	-0.465659	B4DDK6;O14925;Q5SRD1	B4DDK6;O14925;Q5SRD1	Mitochondrial import inner membrane translocase subunit Tim23;Putative mitochondrial import inner membrane translocase subunit Tim23B	TIMM23B, TIMM23
+	9	43	-0.458667	F8W7S5;A0A087WVV2;Q9P2E9;A0A087WU26;H0YDJ4;H9KV85;E9PN67;C9J066;Q8N4C6	F8W7S5;A0A087WVV2;Q9P2E9	Ribosome-binding protein 1	RRBP1
+	15	62	-0.44806	P31040;D6RFM5;A0A087X1I3;H0Y8X1	P31040;D6RFM5;A0A087X1I3	Succinate dehydrogenase [ubiquinone] flavoprotein subunit, mitochondrial	SDHA
+	5	31	-0.435758	P36542	P36542	ATP synthase subunit gamma, mitochondrial	ATP5C1
+	9	36	-0.430617	P36578;H3BM89;H3BTP7;H3BU31	P36578;H3BM89	60S ribosomal protein L4	RPL4
+	4	47	-0.392858	P04181	P04181	Ornithine aminotransferase, mitochondrial;Ornithine aminotransferase, hepatic form;Ornithine aminotransferase, renal form	OAT
+	7	52	-0.327249	P26373;J3QSB4;H3BUK8;J3KS98	P26373;J3QSB4	60S ribosomal protein L13	RPL13
+	1	9	-0.317712	P30049	P30049	ATP synthase subunit delta, mitochondrial	ATP5D
+	24	98	-0.303856	P11498;E9PRE7;E9PS68	P11498;E9PRE7	Pyruvate carboxylase, mitochondrial	PC
+	8	47	-0.295844	P62873;B1AKQ8;F6UT28;F6X3N5;B3KVK2;F5H8J8;F5H100;F5H0S8;E9PCP0;P16520	P62873;B1AKQ8;F6UT28;F6X3N5	Guanine nucleotide-binding protein G(I)/G(S)/G(T) subunit beta-1	GNB1
+	34	454	-0.287055	P25705;K7EK77;K7ENJ4;K7EJP1;K7EQH4;K7ESA0	P25705;K7EK77	ATP synthase subunit alpha, mitochondrial	ATP5A1
+	5	75	-0.249806	Q5JP53;P07437;Q5ST81	Q5JP53;P07437;Q5ST81	Tubulin beta chain	TUBB
+	25	93	-0.241728	P53396;K7EIE7;K7ESG8	P53396	ATP-citrate synthase	ACLY
+	8	74	-0.240771	P26641	P26641	Elongation factor 1-gamma	EEF1G
+	2	4	Only Glass	A0A087WU07;Q5TGZ0	A0A087WU07;Q5TGZ0	MICOS complex subunit MIC10	MINOS1
+	5	16	Only Glass	A0A087X054;Q9Y4L1;E9PJ21;A0A087WWI4;K7EQK2;A0A087X214;A0A087WW13;Q9BST8;J3QQH7;J3QLE9;J3QL06;J3KTF1	A0A087X054;Q9Y4L1	Hypoxia up-regulated protein 1	HYOU1
+	1	6	Only Glass	A0A1W2PRF6;A0A1W2PPX5;A0A1W2PPU6;A0A1W2PQR6;A0A1W2PQB7;A0A1W2PS43;A0A1W2PRS1;Q14108	A0A1W2PRF6;A0A1W2PPX5;A0A1W2PPU6;A0A1W2PQR6;A0A1W2PQB7;A0A1W2PS43;A0A1W2PRS1;Q14108	Lysosome membrane protein 2	SCARB2
+	2	4	Only Glass	A0A2R8Y4Q3;A0A2R8YD53;A0A2R8YGE5;A0A2R8Y3X5;A0A2R8YE78;A0A2R8YDM2;C9JMB8;E5KLJ9;O60313;A0A2R8Y4G4;A0A2R8YE54;A0A2R8YFD1	A0A2R8Y4Q3;A0A2R8YD53;A0A2R8YGE5;A0A2R8Y3X5;A0A2R8YE78;A0A2R8YDM2;C9JMB8;E5KLJ9;O60313;A0A2R8Y4G4;A0A2R8YE54;A0A2R8YFD1	Dynamin-like 120 kDa protein, mitochondrial;Dynamin-like 120 kDa protein, form S1	OPA1
+	1	3	Only Glass	E9PEC3;E7ETT4;E7EUY3;E7ETT1;E9PDR0;C9JQS9;E7EX59;P05166	E9PEC3;E7ETT4;E7EUY3;E7ETT1;E9PDR0;C9JQS9;E7EX59;P05166	Propionyl-CoA carboxylase beta chain, mitochondrial	PCCB
+	1	2	Only Glass	E9PDQ8;Q96I99	E9PDQ8;Q96I99	Succinyl-CoA ligase [GDP-forming] subunit beta, mitochondrial	SUCLG2
+	1	3	Only Glass	E9PIR3;Q9Y5J9	E9PIR3;Q9Y5J9	Mitochondrial import inner membrane translocase subunit Tim8 B	TIMM8B
+	2	9	Only Glass	F5GWZ1;Q9BTZ2	F5GWZ1;Q9BTZ2	Dehydrogenase/reductase SDR family member 4	DHRS4
+	3	10	Only Glass	F8W1K5;F8VXJ7;F8W031;Q9Y2B0;H0YI18	F8W1K5;F8VXJ7;F8W031;Q9Y2B0;H0YI18	Protein canopy homolog 2	CNPY2
+	1	2	Only Glass	I3L1Q8;O43149	I3L1Q8;O43149	Zinc finger ZZ-type and EF-hand domain-containing protein 1	ZZEF1
+	3	13	Only Glass	I3L3P7;P62244;I3L246;H3BN98;H3BV27;H3BT37;I3L303;H3BVC7	I3L3P7;P62244;I3L246;H3BN98	40S ribosomal protein S15a	RPS15A
+	3	4	Only Glass	O14874;H3BUV3;H3BTL2;H3BS02	O14874	[3-methyl-2-oxobutanoate dehydrogenase [lipoamide]] kinase, mitochondrial	BCKDK
+	1	4	Only Glass	O14949	O14949	Cytochrome b-c1 complex subunit 8	UQCRQ
+	2	8	Only Glass	O75600	O75600	2-amino-3-ketobutyrate coenzyme A ligase, mitochondrial	GCAT
+	2	10	Only Glass	P07954	P07954	Fumarate hydratase, mitochondrial	FH
+	1	6	Only Glass	P12236;P12235;V9GYG0	P12236;P12235;V9GYG0	ADP/ATP translocase 3;ADP/ATP translocase 3, N-terminally processed;ADP/ATP translocase 1	SLC25A6,SLC25A4
+	1	2	Only Glass	P52815	P52815	39S ribosomal protein L12, mitochondrial	MRPL12
+	1	3	Only Glass	P60602	P60602	Reactive oxygen species modulator 1	ROMO1
+	1	4	Only Glass	Q15388	Q15388	Mitochondrial import receptor subunit TOM20 homolog	TOMM20
+	1	1	Only Glass	Q5TEA3	Q5TEA3	Uncharacterized protein C20orf194	C20orf194
+	2	6	Only Glass	Q6KCM7;H7C4Z4	Q6KCM7;H7C4Z4	Calcium-binding mitochondrial carrier protein SCaMC-2	SLC25A25
+	2	5	Only Glass	Q6PI78	Q6PI78	Transmembrane protein 65	TMEM65
+	2	6	Only Glass	Q6ZXV5;F8VRY4	Q6ZXV5;F8VRY4	Transmembrane and TPR repeat-containing protein 3	TMTC3
+	1	4	Only Glass	Q8TB36	Q8TB36	Ganglioside-induced differentiation-associated protein 1	GDAP1
+	1	7	Only Glass	Q96IX5	Q96IX5	Up-regulated during skeletal muscle growth protein 5	USMG5
+	1	1	Only Glass	Q99595	Q99595	Mitochondrial import inner membrane translocase subunit Tim17-A	TIMM17A
+	2	5	Only Glass	Q99757;M0QXH0;F8WDN2	Q99757;M0QXH0;F8WDN2	Thioredoxin, mitochondrial	TXN2
+	1	6	Only Glass	Q9NZ45	Q9NZ45	CDGSH iron-sulfur domain-containing protein 1	CISD1
+	3	4	Only Glass	Q9Y697;H7C0I5;H0YGN5	Q9Y697	Cysteine desulfurase, mitochondrial	NFS1
