# Supplementary material for: Proteomic Analysis Reveals a Mitochondrial Remodeling of βTC3 Cells in Response to Nanotopography
Source: Front Cell Dev Biol. 2020 Jul 29;8:508. doi: 10.3389/fcell.2020.00508 (PMC7405422; doi:10.3389/fcell.2020.00508)
Supplement: TABLE S7 — STRING functional grouping of the proteins differentially expressed in mitochondria of cells grown on ns-ZrOx in comparison with mitochondria of cells grown on Glass. Grouping is based on proteins that are statistically and differentially expressed among the two different conditions (t-test p ≤ 0.05) or present only in one condition. The column “Counts” indicates the number of genes present in each category. Functional grouping was based on FDR ≤ 0.05 and at least three counts. [file Table_7.xlsx]

## Sheet: 15 VS CTR
Table S7. Glass vs ns-ZrOx . Network analysis according to STRING of mitochondrial proteins up-regulated in ns-ZrOx or present only in ns-ZrOx
ns-ZrOx Up + ns-ZrOx Only
STRING KEGG
Term description	Counts	FDR	Genes
Glycolysis / Gluconeogenesis	3	0.0072	ALDH9A1,ENO1,PKM
Salmonella infection	3	0.0104	MAPK1,MYH9,RAB7A
Amoebiasis	3	0.0123	ACTN1,ARG1,RAB7A
Prostate cancer	3	0.0123	GSTP1,HSP90AA1,MAPK1
Oocyte meiosis	3	0.0185	MAPK1,YWHAH,YWHAZ
Oxidative phosphorylation	3	0.0242	NDUFB4,NDUFB8,NDUFS4
Estrogen signaling pathway	3	0.0242	HSP90AA1,HSPA8,MAPK1
Non-alcoholic fatty liver disease (NAFLD)	3	0.0267	NDUFB4,NDUFB8,NDUFS4
Parkinson's disease	3	0.0267	NDUFB4,NDUFB8,NDUFS4
Huntington's disease	3	0.0409	NDUFB4,NDUFB8,NDUFS4
Regulation of actin cytoskeleton	3	0.0454	ACTN1,MAPK1,MYH9
Arginine and proline metabolism	4	0.00026	ALDH9A1,ARG1,GOT2,LAP3
Biosynthesis of amino acids	4	0.00076	ARG1,ENO1,GOT2,PKM
Carbon metabolism	4	0.0023	ENO1,GOT2,OGDHL,PKM
Retrograde endocannabinoid signaling	4	0.0049	MAPK1,NDUFB4,NDUFB8,NDUFS4
Epstein-Barr virus infection	4	0.0104	HSPA8,VIM,YWHAH,YWHAZ
PI3K-Akt signaling pathway	4	0.0325	HSP90AA1,MAPK1,YWHAH,YWHAZ
Alzheimer's disease	5	0.00076	IDE,MAPK1,NDUFB4,NDUFB8,NDUFS4
Viral carcinogenesis	6	0.00026	ACTN1,DNAJA3,MAPK1,PKM,YWHAH,YWHAZ
Metabolic pathways	11	0.00076	ALDH9A1,ARG1,ENO1,GOT2,LAP3,NDUFB4,NDUFB8,NDUFS4,NME1,OGDHL,PKM
STRING PROCESS
organic substance metabolic process	26	0.032	ALDH9A1,ANXA1,ARG1,DBI,DNAJA3,EEF2,ENO1,GOT2,GSTP1,HSP90AA1,HSPA8,IDE,LAP3,LRPPRC,MAPK1,MYH9,NDUFB4,NDUFB8,NDUFS4,NME1,OGDHL,OXCT1,PKM,RAB7A,RPL3,YWHAH
localization	25	4.57e-05	ABCB10,ACTN1,ANXA1,ARG1,C2orf47,DNAJA3,EEF2,GOT2,GSTP1,HSP90AA1,HSPA8,IDE,LRPPRC,MAPK1,MYH9,NME1,PAM16,PKM,RAB7A,RPL3,SLC25A3,STXBP1,TM9SF4,YWHAH,YWHAZ
transport	24	2.22e-05	ABCB10,ACTN1,ANXA1,ARG1,C2orf47,EEF2,GOT2,GSTP1,HSP90AA1,HSPA8,IDE,LRPPRC,MAPK1,MYH9,NME1,PAM16,PKM,RAB7A,RPL3,SLC25A3,STXBP1,TM9SF4,YWHAH,YWHAZ
response to stimulus	24	0.0221	ANXA1,ARG1,DNAJA3,EEF2,ENO1,GOT2,GSTP1,HSP90AA1,HSPA8,IDE,MAPK1,MYH9,NDUFB4,NDUFS4,NME1,OXCT1,PKM,RAB7A,RPL3,STXBP1,TM9SF4,VIM,YWHAH,YWHAZ
nitrogen compound metabolic process	24	0.0439	ALDH9A1,ANXA1,ARG1,DBI,DNAJA3,EEF2,ENO1,GOT2,GSTP1,HSP90AA1,HSPA8,IDE,LAP3,LRPPRC,MAPK1,MYH9,NDUFB4,NDUFB8,NDUFS4,NME1,OGDHL,PKM,RAB7A,RPL3
cellular component organization	22	0.0011	ACTN1,ANXA1,ARG1,C2orf47,DNAJA3,HSP90AA1,HSPA8,IDE,MAPK1,MYH9,NDUFB4,NDUFB8,NDUFS4,PAM16,PKM,RAB7A,RPL3,STXBP1,TM9SF4,VIM,YWHAH,YWHAZ
organonitrogen compound metabolic process	22	0.0014	ALDH9A1,ANXA1,ARG1,DBI,EEF2,ENO1,GOT2,GSTP1,HSP90AA1,HSPA8,IDE,LAP3,MAPK1,MYH9,NDUFB4,NDUFB8,NDUFS4,NME1,OGDHL,PKM,RAB7A,RPL3
positive regulation of biological process	21	0.0047	ACTN1,ANXA1,ARG1,DNAJA3,EEF2,ENO1,GSTP1,HSP90AA1,HSPA8,IDE,MAPK1,MYH9,NDUFS4,NME1,OXCT1,RAB7A,STXBP1,TM9SF4,VIM,YWHAH,YWHAZ
multicellular organismal process	21	0.0263	ACTN1,ANXA1,ARG1,DNAJA3,EEF2,GOT2,GSTP1,HSP90AA1,IDE,MAPK1,MYH9,NDUFS4,NME1,OXCT1,PAM16,PKM,RAB7A,STXBP1,VIM,YWHAH,YWHAZ
positive regulation of cellular process	20	0.0036	ACTN1,ANXA1,ARG1,DNAJA3,EEF2,ENO1,GSTP1,HSP90AA1,HSPA8,IDE,MAPK1,MYH9,NDUFS4,NME1,OXCT1,RAB7A,STXBP1,VIM,YWHAH,YWHAZ
response to organic substance	19	2.7e-05	ANXA1,ARG1,DNAJA3,EEF2,GOT2,GSTP1,HSP90AA1,HSPA8,IDE,MAPK1,NDUFS4,NME1,OXCT1,PKM,RPL3,STXBP1,VIM,YWHAH,YWHAZ
regulation of biological quality	19	0.00034	ALDH9A1,ANXA1,C2orf47,DNAJA3,GOT2,GSTP1,HSP90AA1,HSPA8,IDE,MAPK1,MYH9,NME1,OXCT1,RAB7A,STXBP1,TM9SF4,VIM,YWHAH,YWHAZ
cellular nitrogen compound metabolic process	19	0.0126	ALDH9A1,ARG1,DBI,DNAJA3,EEF2,ENO1,GSTP1,HSP90AA1,HSPA8,IDE,LRPPRC,MAPK1,NDUFB4,NDUFB8,NDUFS4,NME1,OGDHL,PKM,RPL3
multicellular organism development	18	0.013	ACTN1,ANXA1,ARG1,DNAJA3,EEF2,GOT2,GSTP1,HSP90AA1,IDE,MAPK1,MYH9,NDUFS4,NME1,OXCT1,PKM,STXBP1,VIM,YWHAH
negative regulation of biological process	18	0.0191	ACTN1,ANXA1,ARG1,DNAJA3,ENO1,GSTP1,HSPA8,IDE,LRPPRC,MAPK1,MYH9,NME1,RAB7A,RPL3,STXBP1,VIM,YWHAH,YWHAZ
organelle organization	17	0.00086	ACTN1,ANXA1,C2orf47,DNAJA3,HSP90AA1,IDE,MYH9,NDUFB4,NDUFB8,NDUFS4,PAM16,RAB7A,RPL3,STXBP1,VIM,YWHAH,YWHAZ
system development	17	0.0102	ACTN1,ANXA1,ARG1,DNAJA3,EEF2,GOT2,GSTP1,HSP90AA1,MAPK1,MYH9,NDUFS4,NME1,OXCT1,PKM,STXBP1,VIM,YWHAH
negative regulation of cellular process	17	0.0168	ACTN1,ANXA1,ARG1,DNAJA3,ENO1,GSTP1,HSPA8,IDE,LRPPRC,MAPK1,MYH9,NME1,RAB7A,STXBP1,VIM,YWHAH,YWHAZ
cellular response to organic substance	15	0.00032	ANXA1,ARG1,EEF2,GSTP1,HSP90AA1,HSPA8,IDE,MAPK1,NME1,PKM,RPL3,STXBP1,VIM,YWHAH,YWHAZ
response to stress	15	0.008	ANXA1,ARG1,DNAJA3,EEF2,GSTP1,HSP90AA1,HSPA8,MAPK1,NDUFB4,OXCT1,PKM,STXBP1,TM9SF4,VIM,YWHAZ
vesicle-mediated transport	14	0.00012	ACTN1,ANXA1,ARG1,EEF2,GSTP1,HSP90AA1,HSPA8,MAPK1,MYH9,NME1,PKM,RAB7A,STXBP1,TM9SF4
small molecule metabolic process	14	0.00018	ARG1,DBI,ENO1,GOT2,GSTP1,HSPA8,MAPK1,NDUFB4,NDUFB8,NDUFS4,NME1,OGDHL,OXCT1,PKM
macromolecule localization	14	0.0013	ANXA1,C2orf47,DNAJA3,GOT2,HSP90AA1,HSPA8,IDE,LRPPRC,MYH9,PAM16,RAB7A,RPL3,STXBP1,YWHAH
immune system process	14	0.0017	ACTN1,ANXA1,ARG1,DNAJA3,EEF2,GSTP1,HSP90AA1,HSPA8,MAPK1,MYH9,PKM,RAB7A,STXBP1,VIM
animal organ development	14	0.0086	ACTN1,ANXA1,ARG1,DNAJA3,EEF2,GOT2,GSTP1,MAPK1,MYH9,NDUFS4,NME1,OXCT1,PKM,VIM
positive regulation of metabolic process	14	0.0175	ACTN1,ANXA1,DNAJA3,EEF2,ENO1,GSTP1,HSP90AA1,HSPA8,IDE,MAPK1,MYH9,RAB7A,VIM,YWHAH
cell activation	13	2.22e-05	ANXA1,ARG1,DNAJA3,EEF2,GSTP1,HSP90AA1,HSPA8,MAPK1,MYH9,PKM,RAB7A,STXBP1,YWHAZ
secretion	13	2.22e-05	ACTN1,ANXA1,ARG1,EEF2,GOT2,GSTP1,HSP90AA1,HSPA8,MAPK1,NME1,PKM,RAB7A,STXBP1
organic substance transport	13	0.0016	ANXA1,C2orf47,GOT2,HSP90AA1,HSPA8,IDE,LRPPRC,MYH9,PAM16,RAB7A,RPL3,STXBP1,YWHAH
cellular localization	13	0.0027	C2orf47,DNAJA3,HSP90AA1,HSPA8,IDE,LRPPRC,MYH9,PAM16,RAB7A,RPL3,STXBP1,YWHAH,YWHAZ
regulation of cellular component organization	13	0.0038	ANXA1,ENO1,HSP90AA1,HSPA8,IDE,MAPK1,MYH9,NME1,RAB7A,STXBP1,VIM,YWHAH,YWHAZ
regulation of localization	13	0.0074	ACTN1,ANXA1,ARG1,GSTP1,HSP90AA1,HSPA8,MAPK1,OXCT1,RAB7A,STXBP1,TM9SF4,YWHAH,YWHAZ
response to endogenous stimulus	12	0.00027	ANXA1,ARG1,EEF2,GOT2,GSTP1,IDE,MAPK1,NME1,OXCT1,PKM,STXBP1,YWHAH
response to oxygen-containing compound	12	0.0004	ANXA1,ARG1,EEF2,GOT2,GSTP1,IDE,MAPK1,NDUFS4,NME1,OXCT1,PKM,STXBP1
immune response	12	0.00082	ANXA1,ARG1,DNAJA3,EEF2,GSTP1,HSP90AA1,HSPA8,MAPK1,PKM,RAB7A,STXBP1,VIM
establishment of localization in cell	12	0.00099	C2orf47,HSP90AA1,HSPA8,IDE,LRPPRC,MYH9,PAM16,RAB7A,RPL3,STXBP1,YWHAH,YWHAZ
organic substance catabolic process	12	0.00099	ARG1,ENO1,GOT2,HSP90AA1,HSPA8,IDE,OGDHL,OXCT1,PKM,RAB7A,RPL3,YWHAH
nitrogen compound transport	12	0.0014	ANXA1,C2orf47,HSP90AA1,HSPA8,IDE,LRPPRC,MYH9,PAM16,RAB7A,RPL3,STXBP1,YWHAH
protein localization	12	0.0035	ANXA1,C2orf47,DNAJA3,HSP90AA1,HSPA8,IDE,MYH9,PAM16,RAB7A,RPL3,STXBP1,YWHAH
cellular component assembly	12	0.0113	ACTN1,ARG1,HSP90AA1,IDE,NDUFB4,NDUFB8,NDUFS4,PKM,RAB7A,RPL3,TM9SF4,YWHAZ
regulation of protein metabolic process	12	0.0231	DNAJA3,EEF2,ENO1,GSTP1,HSP90AA1,IDE,LRPPRC,MAPK1,MYH9,NDUFS4,RAB7A,VIM
positive regulation of nitrogen compound metabolic process	12	0.0415	ACTN1,DNAJA3,EEF2,ENO1,HSP90AA1,HSPA8,IDE,MAPK1,MYH9,RAB7A,VIM,YWHAH
response to hormone	11	3.89e-05	ANXA1,ARG1,EEF2,GOT2,GSTP1,IDE,NME1,OXCT1,PKM,STXBP1,YWHAH
leukocyte activation	11	5.41e-05	ANXA1,ARG1,DNAJA3,EEF2,GSTP1,HSP90AA1,HSPA8,MAPK1,MYH9,PKM,RAB7A
secretion by cell	11	9.96e-05	ACTN1,ANXA1,ARG1,EEF2,GSTP1,HSP90AA1,HSPA8,MAPK1,PKM,RAB7A,STXBP1
protein transport	11	0.0012	ANXA1,C2orf47,HSP90AA1,HSPA8,IDE,MYH9,PAM16,RAB7A,RPL3,STXBP1,YWHAH
cellular catabolic process	11	0.0035	ARG1,ENO1,GOT2,HSP90AA1,HSPA8,IDE,OGDHL,OXCT1,PKM,RAB7A,RPL3
phosphate-containing compound metabolic process	11	0.0126	DBI,ENO1,HSP90AA1,HSPA8,MAPK1,NDUFB4,NDUFB8,NDUFS4,NME1,OGDHL,PKM
nervous system development	11	0.0177	ANXA1,EEF2,GSTP1,HSP90AA1,MAPK1,NDUFS4,NME1,OXCT1,STXBP1,VIM,YWHAH
regulation of cellular protein metabolic process	11	0.0345	DNAJA3,EEF2,ENO1,GSTP1,HSP90AA1,IDE,LRPPRC,MAPK1,MYH9,NDUFS4,VIM
nucleotide metabolic process	10	2.22e-05	DBI,ENO1,HSPA8,MAPK1,NDUFB4,NDUFB8,NDUFS4,NME1,OGDHL,PKM
regulated exocytosis	10	4.71e-05	ACTN1,ARG1,EEF2,GSTP1,HSP90AA1,HSPA8,MAPK1,PKM,RAB7A,STXBP1
response to organonitrogen compound	10	0.00024	ANXA1,ARG1,EEF2,GOT2,GSTP1,IDE,MAPK1,NDUFS4,NME1,PKM
response to organic cyclic compound	10	0.00024	ANXA1,ARG1,EEF2,GOT2,GSTP1,MAPK1,NDUFS4,NME1,STXBP1,YWHAH
response to cytokine	10	0.00072	ANXA1,ARG1,DNAJA3,HSP90AA1,HSPA8,MAPK1,RPL3,STXBP1,VIM,YWHAZ
cellular protein localization	10	0.0035	C2orf47,DNAJA3,HSP90AA1,HSPA8,IDE,PAM16,RAB7A,RPL3,STXBP1,YWHAH
organonitrogen compound biosynthetic process	10	0.0035	ALDH9A1,ARG1,EEF2,ENO1,GOT2,GSTP1,NME1,OGDHL,PKM,RPL3
homeostatic process	10	0.0055	ANXA1,C2orf47,DNAJA3,GSTP1,HSP90AA1,IDE,MAPK1,NME1,RAB7A,TM9SF4
regulation of transport	10	0.0122	ANXA1,ARG1,HSPA8,MAPK1,OXCT1,RAB7A,STXBP1,TM9SF4,YWHAH,YWHAZ
protein-containing complex subunit organization	10	0.0136	ARG1,HSP90AA1,HSPA8,IDE,NDUFB4,NDUFB8,NDUFS4,PKM,RPL3,TM9SF4
mitochondrion organization	9	2.22e-05	C2orf47,DNAJA3,HSP90AA1,NDUFB4,NDUFB8,NDUFS4,PAM16,YWHAH,YWHAZ
purine ribonucleotide metabolic process	9	2.22e-05	DBI,ENO1,HSPA8,NDUFB4,NDUFB8,NDUFS4,NME1,OGDHL,PKM
drug metabolic process	9	0.00015	ENO1,HSPA8,IDE,NDUFB4,NDUFB8,NDUFS4,OGDHL,OXCT1,PKM
cellular response to cytokine stimulus	9	0.0016	ANXA1,ARG1,HSP90AA1,HSPA8,MAPK1,RPL3,STXBP1,VIM,YWHAZ
phosphorylation	9	0.0061	ENO1,HSP90AA1,MAPK1,NDUFB4,NDUFB8,NDUFS4,NME1,OGDHL,PKM
intracellular transport	9	0.0111	C2orf47,HSP90AA1,HSPA8,IDE,LRPPRC,PAM16,RAB7A,RPL3,YWHAH
regulation of apoptotic process	9	0.0152	ACTN1,ANXA1,DNAJA3,ENO1,GSTP1,NME1,STXBP1,YWHAH,YWHAZ
protein-containing complex assembly	9	0.0159	ARG1,HSP90AA1,IDE,NDUFB4,NDUFB8,NDUFS4,PKM,RPL3,TM9SF4
neurogenesis	9	0.0161	ANXA1,EEF2,GSTP1,HSP90AA1,MAPK1,NME1,STXBP1,VIM,YWHAH
positive regulation of protein metabolic process	9	0.0199	DNAJA3,EEF2,ENO1,HSP90AA1,IDE,MAPK1,MYH9,RAB7A,VIM
response to external stimulus	9	0.0415	ANXA1,ARG1,EEF2,ENO1,GSTP1,HSPA8,MAPK1,OXCT1,PKM
purine ribonucleoside triphosphate metabolic process	8	2.22e-05	ENO1,HSPA8,NDUFB4,NDUFB8,NDUFS4,NME1,OGDHL,PKM
neutrophil degranulation	8	0.00021	ARG1,EEF2,GSTP1,HSP90AA1,HSPA8,MAPK1,PKM,RAB7A
cellular amide metabolic process	8	0.0016	ARG1,DBI,EEF2,GSTP1,HSP90AA1,HSPA8,IDE,RPL3
membrane organization	8	0.0016	C2orf47,DNAJA3,HSP90AA1,HSPA8,MYH9,RAB7A,YWHAH,YWHAZ
response to lipid	8	0.0029	ANXA1,ARG1,EEF2,GSTP1,MAPK1,NME1,STXBP1,YWHAH
intracellular protein transport	8	0.003	C2orf47,HSP90AA1,HSPA8,IDE,PAM16,RAB7A,RPL3,YWHAH
positive regulation of transport	8	0.0039	ANXA1,MAPK1,OXCT1,RAB7A,STXBP1,TM9SF4,YWHAH,YWHAZ
regulation of protein localization	8	0.0041	ANXA1,HSP90AA1,HSPA8,MAPK1,OXCT1,TM9SF4,YWHAH,YWHAZ
response to drug	8	0.0041	ANXA1,ARG1,EEF2,GOT2,GSTP1,MAPK1,NME1,OXCT1
oxidation-reduction process	8	0.0046	ALDH9A1,ENO1,GSTP1,NDUFB4,NDUFB8,NDUFS4,OGDHL,PKM
cellular response to endogenous stimulus	8	0.0109	ANXA1,ARG1,EEF2,GSTP1,IDE,MAPK1,PKM,YWHAH
regulation of response to stress	8	0.0211	ANXA1,ARG1,DNAJA3,ENO1,GSTP1,HSP90AA1,HSPA8,MAPK1
ATP metabolic process	7	2.22e-05	ENO1,HSPA8,NDUFB4,NDUFB8,NDUFS4,OGDHL,PKM
mitochondrial transport	7	2.88e-05	ABCB10,C2orf47,HSP90AA1,PAM16,SLC25A3,YWHAH,YWHAZ
purine ribonucleoside monophosphate metabolic process	7	3.17e-05	ENO1,HSPA8,NDUFB4,NDUFB8,NDUFS4,OGDHL,PKM
response to antibiotic	7	0.00012	ANXA1,ARG1,EEF2,GOT2,GSTP1,HSP90AA1,OXCT1
protein targeting	7	0.00015	C2orf47,HSP90AA1,HSPA8,IDE,PAM16,RAB7A,RPL3
generation of precursor metabolites and energy	7	0.00036	ENO1,NDUFB4,NDUFB8,NDUFS4,OGDHL,OXCT1,PKM
establishment of protein localization to organelle	7	0.0004	C2orf47,HSP90AA1,HSPA8,IDE,PAM16,RAB7A,RPL3
response to nutrient levels	7	0.00082	ARG1,EEF2,GSTP1,HSPA8,MAPK1,OXCT1,PKM
response to toxic substance	7	0.0009	ANXA1,ARG1,EEF2,GOT2,GSTP1,MAPK1,OXCT1
cofactor metabolic process	7	0.0009	DBI,ENO1,GOT2,GSTP1,HSP90AA1,OGDHL,PKM
endocytosis	7	0.0013	ANXA1,HSP90AA1,MAPK1,MYH9,NME1,RAB7A,TM9SF4
regulation of establishment of protein localization	7	0.0038	ANXA1,HSPA8,MAPK1,OXCT1,TM9SF4,YWHAH,YWHAZ
regulation of cellular localization	7	0.0073	HSP90AA1,MAPK1,OXCT1,STXBP1,TM9SF4,YWHAH,YWHAZ
regulation of catabolic process	7	0.0106	HSP90AA1,HSPA8,IDE,LRPPRC,RAB7A,VIM,YWHAZ
central nervous system development	7	0.0118	GSTP1,HSP90AA1,MAPK1,NDUFS4,NME1,OXCT1,VIM
cellular response to oxygen-containing compound	7	0.013	ANXA1,ARG1,GSTP1,IDE,MAPK1,NME1,PKM
positive regulation of cellular component organization	7	0.0317	ANXA1,HSP90AA1,IDE,MAPK1,NME1,YWHAH,YWHAZ
phagocytosis	6	0.00011	ANXA1,HSP90AA1,MAPK1,MYH9,RAB7A,TM9SF4
response to peptide hormone	6	0.0016	ANXA1,ARG1,GOT2,GSTP1,IDE,PKM
response to oxidative stress	6	0.0017	ANXA1,ARG1,EEF2,GSTP1,MAPK1,NDUFB4
gland development	6	0.0021	ANXA1,ARG1,GOT2,MAPK1,NME1,PKM
posttranscriptional regulation of gene expression	6	0.0033	EEF2,HSPA8,LRPPRC,MAPK1,VIM,YWHAZ
cellular response to lipid	6	0.0046	ANXA1,ARG1,GSTP1,MAPK1,NME1,YWHAH
peptide metabolic process	6	0.0049	EEF2,GSTP1,HSP90AA1,HSPA8,IDE,RPL3
response to wounding	6	0.0073	ANXA1,ARG1,MAPK1,PKM,STXBP1,YWHAZ
hematopoietic or lymphoid organ development	6	0.0088	ACTN1,ANXA1,DNAJA3,EEF2,MAPK1,MYH9
cellular response to hormone stimulus	6	0.0094	ANXA1,ARG1,GSTP1,IDE,PKM,YWHAH
cellular homeostasis	6	0.0266	C2orf47,IDE,MAPK1,NME1,RAB7A,TM9SF4
cellular protein-containing complex assembly	6	0.0295	HSP90AA1,NDUFB4,NDUFB8,NDUFS4,RPL3,TM9SF4
carboxylic acid metabolic process	6	0.0325	ARG1,ENO1,GOT2,GSTP1,OGDHL,PKM
negative regulation of apoptotic process	6	0.0331	ANXA1,DNAJA3,ENO1,GSTP1,STXBP1,YWHAZ
regulation of immune response	6	0.0353	ANXA1,ARG1,DNAJA3,HSP90AA1,MAPK1,STXBP1
positive regulation of cell population proliferation	6	0.036	ANXA1,ARG1,DNAJA3,MAPK1,NDUFS4,NME1
positive regulation of immune system process	6	0.0366	ANXA1,ARG1,DNAJA3,HSP90AA1,MAPK1,STXBP1
organonitrogen compound catabolic process	6	0.0477	ARG1,GOT2,HSP90AA1,HSPA8,IDE,RAB7A
response to reactive oxygen species	5	0.00099	ANXA1,ARG1,EEF2,GSTP1,MAPK1
gliogenesis	5	0.0011	ANXA1,EEF2,GSTP1,MAPK1,VIM
response to nutrient	5	0.0013	ARG1,EEF2,GSTP1,OXCT1,PKM
regulation of protein stability	5	0.0024	DNAJA3,HSP90AA1,HSPA8,MAPK1,STXBP1
nucleotide biosynthetic process	5	0.0037	ENO1,MAPK1,NME1,OGDHL,PKM
small molecule catabolic process	5	0.0096	ARG1,ENO1,GOT2,OXCT1,PKM
positive regulation of establishment of protein localization	5	0.0103	MAPK1,OXCT1,TM9SF4,YWHAH,YWHAZ
protein localization to membrane	5	0.0109	C2orf47,DNAJA3,HSP90AA1,RPL3,STXBP1
wound healing	5	0.0152	ANXA1,MAPK1,PKM,STXBP1,YWHAZ
regulation of cellular protein localization	5	0.0155	HSP90AA1,MAPK1,TM9SF4,YWHAH,YWHAZ
monocarboxylic acid metabolic process	5	0.0168	ENO1,GOT2,GSTP1,OGDHL,PKM
cellular response to growth factor stimulus	5	0.0168	ANXA1,ARG1,EEF2,GSTP1,MAPK1
regulation of body fluid levels	5	0.0174	GOT2,MAPK1,NME1,STXBP1,YWHAZ
cellular response to organonitrogen compound	5	0.0175	ARG1,GSTP1,IDE,MAPK1,PKM
organic cyclic compound catabolic process	5	0.0175	ENO1,OGDHL,PKM,RPL3,YWHAH
cell morphogenesis involved in differentiation	5	0.019	ACTN1,HSP90AA1,MAPK1,MYH9,STXBP1
cellular response to organic cyclic compound	5	0.02	ANXA1,ARG1,GSTP1,MAPK1,YWHAH
regulation of hormone levels	5	0.0208	ALDH9A1,ANXA1,IDE,OXCT1,YWHAH
hemopoiesis	5	0.0225	ACTN1,ANXA1,DNAJA3,EEF2,MYH9
small molecule biosynthetic process	5	0.0281	ENO1,GOT2,NME1,OGDHL,PKM
viral process	5	0.0284	HSPA8,IDE,MAPK1,RAB7A,VIM
organelle localization	5	0.0288	HSP90AA1,LRPPRC,MYH9,STXBP1,YWHAZ
regulation of cellular response to stress	5	0.0364	ENO1,GSTP1,HSP90AA1,HSPA8,MAPK1
regulation of protein transport	5	0.037	ANXA1,HSPA8,MAPK1,OXCT1,TM9SF4
negative regulation of cellular component organization	5	0.0387	HSPA8,RAB7A,STXBP1,VIM,YWHAH
cytokine-mediated signaling pathway	5	0.0429	ANXA1,HSP90AA1,HSPA8,VIM,YWHAZ
cellular chemical homeostasis	5	0.0445	C2orf47,MAPK1,NME1,RAB7A,TM9SF4
innate immune response	5	0.0467	ANXA1,ARG1,DNAJA3,STXBP1,VIM
negative regulation of cell differentiation	5	0.0479	ANXA1,MAPK1,NME1,VIM,YWHAH
nucleoside diphosphate phosphorylation	4	0.00024	ENO1,NME1,OGDHL,PKM
purine ribonucleoside triphosphate biosynthetic process	4	0.00084	ENO1,NME1,OGDHL,PKM
mitochondrial membrane organization	4	0.002	C2orf47,HSP90AA1,YWHAH,YWHAZ
mammary gland development	4	0.002	ARG1,GOT2,MAPK1,NME1
response to estradiol	4	0.0021	ANXA1,EEF2,GSTP1,STXBP1
response to ethanol	4	0.0026	EEF2,GOT2,GSTP1,OXCT1
nucleobase-containing small molecule biosynthetic process	4	0.0035	ENO1,NME1,OGDHL,PKM
cellular respiration	4	0.0035	NDUFB4,NDUFB8,NDUFS4,OGDHL
purine ribonucleotide biosynthetic process	4	0.0063	ENO1,NME1,OGDHL,PKM
cellular response to steroid hormone stimulus	4	0.0071	ANXA1,ARG1,GSTP1,YWHAH
response to insulin	4	0.0088	GOT2,GSTP1,IDE,PKM
regulation of leukocyte proliferation	4	0.0088	ANXA1,ARG1,DNAJA3,GSTP1
cellular response to peptide hormone stimulus	4	0.0121	ARG1,GSTP1,IDE,PKM
aging	4	0.013	ARG1,DNAJA3,EEF2,IDE
positive regulation of cellular protein localization	4	0.0173	MAPK1,TM9SF4,YWHAH,YWHAZ
coenzyme metabolic process	4	0.0187	DBI,ENO1,OGDHL,PKM
cellular response to drug	4	0.0211	ANXA1,ARG1,MAPK1,NME1
carboxylic acid biosynthetic process	4	0.0213	ENO1,GOT2,OGDHL,PKM
response to acid chemical	4	0.0231	ARG1,EEF2,GSTP1,NME1
regulation of translation	4	0.0235	EEF2,LRPPRC,MAPK1,VIM
regulation of apoptotic signaling pathway	4	0.0366	ENO1,GSTP1,YWHAH,YWHAZ
nucleobase-containing compound catabolic process	4	0.0379	ENO1,OGDHL,PKM,RPL3
negative regulation of immune system process	4	0.0454	ANXA1,ARG1,DNAJA3,NME1
regulation of protein complex assembly	4	0.0454	HSP90AA1,HSPA8,IDE,STXBP1
glycolytic process	3	0.0016	ENO1,OGDHL,PKM
ATP generation from ADP	3	0.0016	ENO1,OGDHL,PKM
pyruvate biosynthetic process	3	0.0018	ENO1,OGDHL,PKM
mitochondrial electron transport, NADH to ubiquinone	3	0.002	NDUFB4,NDUFB8,NDUFS4
regulation of cellular response to heat	3	0.0021	HSP90AA1,HSPA8,MAPK1
negative regulation of cytokine-mediated signaling pathway	3	0.0031	ARG1,DNAJA3,GSTP1
cellular response to glucocorticoid stimulus	3	0.0032	ANXA1,ARG1,GSTP1
protein targeting to mitochondrion	3	0.0035	C2orf47,HSP90AA1,PAM16
mitochondrial respiratory chain complex I assembly	3	0.0043	NDUFB4,NDUFB8,NDUFS4
pyruvate metabolic process	3	0.0044	ENO1,OGDHL,PKM
nicotinamide nucleotide biosynthetic process	3	0.0047	ENO1,OGDHL,PKM
ATP biosynthetic process	3	0.0057	ENO1,OGDHL,PKM
regulation of cellular pH	3	0.0072	MAPK1,RAB7A,TM9SF4
response to vitamin	3	0.008	ARG1,EEF2,GSTP1
tissue remodeling	3	0.0093	ANXA1,ARG1,RAB7A
purine ribonucleoside monophosphate biosynthetic process	3	0.0102	ENO1,OGDHL,PKM
nucleotide catabolic process	3	0.0106	ENO1,OGDHL,PKM
nicotinamide nucleotide metabolic process	3	0.0118	ENO1,OGDHL,PKM
positive regulation of translation	3	0.0121	EEF2,MAPK1,VIM
response to hydrogen peroxide	3	0.0125	ANXA1,ARG1,EEF2
glucose metabolic process	3	0.0126	ENO1,GOT2,PKM
regulation of mRNA stability	3	0.0126	HSPA8,VIM,YWHAZ
platelet activation	3	0.014	MAPK1,STXBP1,YWHAZ
liver development	3	0.0147	ANXA1,ARG1,PKM
cellular response to reactive oxygen species	3	0.0149	ANXA1,ARG1,MAPK1
negative regulation of immune response	3	0.0176	ANXA1,ARG1,DNAJA3
cellular response to lipopolysaccharide	3	0.0205	ARG1,GSTP1,MAPK1
regeneration	3	0.0221	ANXA1,GSTP1,PKM
regulation of T cell proliferation	3	0.0221	ANXA1,ARG1,DNAJA3
cellular response to insulin stimulus	3	0.0224	GSTP1,IDE,PKM
glial cell differentiation	3	0.0226	GSTP1,MAPK1,VIM
positive regulation of multi-organism process	3	0.0236	ARG1,HSPA8,RAB7A
regulation of synaptic plasticity	3	0.0253	MAPK1,STXBP1,YWHAH
protein stabilization	3	0.026	DNAJA3,HSP90AA1,STXBP1
regulation of exocytosis	3	0.0266	ANXA1,RAB7A,STXBP1
membrane docking	3	0.0266	HSP90AA1,RAB7A,STXBP1
positive regulation of intracellular transport	3	0.0284	MAPK1,STXBP1,TM9SF4
response to starvation	3	0.0287	HSPA8,MAPK1,OXCT1
response to interferon-gamma	3	0.029	DNAJA3,STXBP1,VIM
negative regulation of defense response	3	0.0304	ARG1,DNAJA3,GSTP1
cellular modified amino acid metabolic process	3	0.0321	ALDH9A1,GOT2,GSTP1
positive regulation of immune effector process	3	0.0325	ANXA1,ARG1,STXBP1
hormone metabolic process	3	0.0325	ALDH9A1,IDE,YWHAH
cellular response to toxic substance	3	0.0359	ANXA1,ARG1,GSTP1
regulation of symbiosis, encompassing mutualism through parasitism	3	0.0387	ARG1,HSPA8,RAB7A
protein folding	3	0.0428	DNAJA3,HSP90AA1,HSPA8
positive regulation of protein catabolic process	3	0.0439	HSP90AA1,IDE,RAB7A
establishment of protein localization to membrane	3	0.0439	C2orf47,HSP90AA1,RPL3
T cell activation	3	0.0467	ANXA1,DNAJA3,MYH9
STRING COMPONENT
cytoplasmic part	38	1.2e-10	ABCB10,ACTN1,ALDH9A1,ANXA1,ARG1,C2orf47,DBI,DNAJA3,EEF2,EMC8,ENO1,GOT2,GSTP1,HSP90AA1,HSPA8,IDE,LAP3,LRPPRC,LRRC59,MAPK1,MYH9,NDUFB4,NDUFB8,NDUFS4,NIPSNAP3A,NME1,OGDHL,OXCT1,PAM16,PKM,RAB7A,RPL3,SLC25A3,STXBP1,TM9SF4,VIM,YWHAH,YWHAZ					AIFM1,ALDH18A1,ATP13A1,ATP5A1,ATP5B,ATP5C1,ATP5D,ATP5H,CALR,CHCHD3,CISD1,CLPX,COA3,COX6B1,DHRS4,DNAJA1,ESYT1,ETFDH,FKBP2,GCAT,GDAP1,GNB1,GPD2,GRPEL1,HSP90B1,HSPA5,HSPD1,IMMT,LETM1,MAOB,MINOS1,MLEC,MPC1,MRPL12,MRPL48,MT-CO2,NDUFA12,NDUFA13,NDUFA4,NDUFS2,NDUFV1,NDUFV2,NNT,OGDH,OPA1,PDIA3,PGAM5,PHB2,RAB10,RAB3D,ROMO1,RPN2,RRBP1,SAMM50,SCARB2,SDHA,SFXN3,SLC25A25,SLC25A5,SLC25A6,TIMM17A,TIMM23B,TIMM8B…
membrane-bounded organelle	37	1.36e-06	ABCB10,ACTN1,ANXA1,ARG1,C2orf47,DBI,DNAJA3,EEF2,EMC8,ENO1,GOT2,GSTP1,HSP90AA1,HSPA8,IDE,LAP3,LRPPRC,LRRC59,MAPK1,MYH9,NDUFB4,NDUFB8,NDUFS4,NIPSNAP3A,NME1,OGDHL,OXCT1,PAM16,PKM,RAB7A,RPL3,SLC25A3,STXBP1,TM9SF4,VIM,YWHAH,YWHAZ
intracellular organelle	37	6.4e-06	ABCB10,ACTN1,ANXA1,ARG1,C2orf47,DBI,DNAJA3,EEF2,EMC8,ENO1,GOT2,GSTP1,HSP90AA1,HSPA8,IDE,LAP3,LRPPRC,LRRC59,MAPK1,MYH9,NDUFB4,NDUFB8,NDUFS4,NIPSNAP3A,NME1,OGDHL,OXCT1,PAM16,PKM,RAB7A,RPL3,SLC25A3,STXBP1,TM9SF4,VIM,YWHAH,YWHAZ
intracellular membrane-bounded organelle	35	4.59e-06	ABCB10,ANXA1,ARG1,C2orf47,DBI,DNAJA3,EMC8,ENO1,GOT2,GSTP1,HSP90AA1,HSPA8,IDE,LAP3,LRPPRC,LRRC59,MAPK1,MYH9,NDUFB4,NDUFB8,NDUFS4,NIPSNAP3A,NME1,OGDHL,OXCT1,PAM16,PKM,RAB7A,RPL3,SLC25A3,STXBP1,TM9SF4,VIM,YWHAH,YWHAZ
organelle part	34	1.61e-06	ABCB10,ACTN1,ANXA1,ARG1,C2orf47,DBI,DNAJA3,EEF2,EMC8,ENO1,GOT2,GSTP1,HSP90AA1,HSPA8,IDE,LAP3,LRPPRC,LRRC59,MAPK1,MYH9,NDUFB4,NDUFB8,NDUFS4,NME1,OGDHL,OXCT1,PAM16,PKM,RAB7A,RPL3,SLC25A3,STXBP1,VIM,YWHAZ
intracellular organelle part	33	4.32e-06	ABCB10,ACTN1,ANXA1,ARG1,C2orf47,DBI,DNAJA3,EEF2,EMC8,GOT2,GSTP1,HSP90AA1,HSPA8,IDE,LAP3,LRPPRC,LRRC59,MAPK1,MYH9,NDUFB4,NDUFB8,NDUFS4,NME1,OGDHL,OXCT1,PAM16,PKM,RAB7A,RPL3,SLC25A3,STXBP1,VIM,YWHAZ
membrane	29	0.00032	ABCB10,ACTN1,ANXA1,ARG1,C2orf47,DNAJA3,EEF2,EMC8,ENO1,GOT2,GSTP1,HSP90AA1,HSPA8,IDE,LRPPRC,LRRC59,MAPK1,MYH9,NDUFB4,NDUFB8,NDUFS4,NME1,PAM16,RAB7A,SLC25A3,STXBP1,TM9SF4,VIM,YWHAH
intracellular organelle lumen	25	6.83e-06	ACTN1,ANXA1,ARG1,C2orf47,DBI,DNAJA3,EEF2,GOT2,GSTP1,HSP90AA1,HSPA8,IDE,LAP3,LRPPRC,LRRC59,MAPK1,NDUFB8,OGDHL,OXCT1,PAM16,PKM,RPL3,STXBP1,VIM,YWHAZ
mitochondrion	24	3.36e-15	ABCB10,ANXA1,ARG1,C2orf47,DNAJA3,EMC8,GOT2,GSTP1,IDE,LRPPRC,LRRC59,MAPK1,NDUFB4,NDUFB8,NDUFS4,NIPSNAP3A,NME1,OGDHL,OXCT1,PAM16,SLC25A3,STXBP1,YWHAH,YWHAZ
cytosol	24	1.27e-05	ACTN1,ALDH9A1,ANXA1,ARG1,DNAJA3,EEF2,EMC8,ENO1,GSTP1,HSP90AA1,HSPA8,IDE,LAP3,MAPK1,MYH9,NIPSNAP3A,NME1,PKM,RAB7A,RPL3,STXBP1,VIM,YWHAH,YWHAZ
protein-containing complex	21	0.00043	ANXA1,EEF2,EMC8,ENO1,GOT2,GSTP1,HSP90AA1,HSPA8,IDE,LRPPRC,MAPK1,MYH9,NDUFB4,NDUFB8,NDUFS4,OGDHL,PAM16,PKM,RPL3,STXBP1,VIM
membrane part	21	0.0189	ABCB10,ANXA1,DNAJA3,EEF2,EMC8,GOT2,HSP90AA1,HSPA8,LRPPRC,LRRC59,MAPK1,MYH9,NDUFB4,NDUFB8,NDUFS4,NME1,PAM16,RAB7A,SLC25A3,STXBP1,TM9SF4
nucleus	21	0.0329	ANXA1,DNAJA3,EMC8,ENO1,GSTP1,HSP90AA1,HSPA8,IDE,LAP3,LRPPRC,LRRC59,MAPK1,MYH9,NDUFB4,NME1,OXCT1,PKM,RPL3,STXBP1,VIM,YWHAZ
endomembrane system	19	0.0011	ACTN1,ANXA1,ARG1,DBI,EEF2,EMC8,GSTP1,HSP90AA1,HSPA8,LAP3,LRPPRC,LRRC59,MAPK1,NDUFB4,NDUFB8,PKM,RAB7A,STXBP1,TM9SF4
plasma membrane	18	0.0189	ACTN1,ANXA1,DNAJA3,EEF2,ENO1,GOT2,GSTP1,HSP90AA1,HSPA8,IDE,MAPK1,MYH9,NME1,RAB7A,SLC25A3,STXBP1,VIM,YWHAH
mitochondrial part	16	2.4e-09	ABCB10,ANXA1,ARG1,C2orf47,DNAJA3,GOT2,LRPPRC,LRRC59,NDUFB4,NDUFB8,NDUFS4,NME1,OGDHL,OXCT1,PAM16,SLC25A3
organelle membrane	16	0.0017	ABCB10,ANXA1,ARG1,C2orf47,EMC8,GOT2,HSPA8,LRPPRC,LRRC59,NDUFB4,NDUFB8,NDUFS4,NME1,PAM16,RAB7A,SLC25A3
cytoplasmic vesicle	14	0.00039	ACTN1,ANXA1,ARG1,EEF2,GSTP1,HSP90AA1,HSPA8,MAPK1,PKM,RAB7A,STXBP1,TM9SF4,VIM,YWHAZ
intracellular non-membrane-bounded organelle	14	0.047	ACTN1,DNAJA3,EEF2,ENO1,HSPA8,LRPPRC,LRRC59,MAPK1,MYH9,NME1,RAB7A,RPL3,STXBP1,VIM
organelle envelope	13	4.32e-06	ABCB10,ANXA1,ARG1,C2orf47,GOT2,LRPPRC,LRRC59,NDUFB4,NDUFB8,NDUFS4,NME1,PAM16,SLC25A3
mitochondrial membrane	11	1.9e-06	ABCB10,ANXA1,ARG1,C2orf47,GOT2,NDUFB4,NDUFB8,NDUFS4,NME1,PAM16,SLC25A3
secretory granule	10	3.4e-05	ACTN1,ARG1,EEF2,GSTP1,HSP90AA1,HSPA8,MAPK1,PKM,RAB7A,STXBP1
cytoplasmic vesicle part	10	0.0021	ACTN1,ANXA1,ARG1,EEF2,GSTP1,HSP90AA1,HSPA8,MAPK1,PKM,RAB7A
plasma membrane bounded cell projection	10	0.0126	ACTN1,ANXA1,ARG1,HSP90AA1,MAPK1,MYH9,NME1,PKM,STXBP1,VIM
mitochondrial matrix	9	4.59e-06	C2orf47,DNAJA3,GOT2,LRPPRC,LRRC59,NDUFB8,OGDHL,OXCT1,PAM16
organelle inner membrane	9	7.09e-06	ABCB10,C2orf47,GOT2,LRPPRC,NDUFB4,NDUFB8,NDUFS4,PAM16,SLC25A3
secretory granule lumen	8	4.48e-06	ACTN1,ARG1,EEF2,GSTP1,HSP90AA1,HSPA8,MAPK1,PKM
mitochondrial inner membrane	8	2.85e-05	ABCB10,C2orf47,GOT2,NDUFB4,NDUFB8,NDUFS4,PAM16,SLC25A3
whole membrane	8	0.0329	ANXA1,ARG1,EEF2,HSPA8,LRPPRC,MAPK1,NME1,RAB7A
myelin sheath	7	1.36e-06	GOT2,HSP90AA1,HSPA8,NME1,PKM,SLC25A3,STXBP1
plasma membrane region	7	0.0173	ANXA1,DNAJA3,HSP90AA1,MAPK1,MYH9,NME1,STXBP1
catalytic complex	7	0.0393	ENO1,IDE,NDUFB4,NDUFB8,NDUFS4,OGDHL,PKM
ficolin-1-rich granule lumen	6	4.48e-06	EEF2,GSTP1,HSP90AA1,HSPA8,MAPK1,PKM
lysosome	6	0.0047	ANXA1,ARG1,HSP90AA1,HSPA8,MAPK1,RAB7A
mitochondrial membrane part	5	0.00043	ABCB10,NDUFB4,NDUFB8,NDUFS4,PAM16
cell leading edge	5	0.0043	ACTN1,HSP90AA1,MYH9,NME1,VIM
vacuolar part	5	0.0104	ARG1,HSP90AA1,HSPA8,MAPK1,RAB7A
perinuclear region of cytoplasm	5	0.0329	DBI,HSP90AA1,LRPPRC,NME1,STXBP1
oxidoreductase complex	4	0.00045	NDUFB4,NDUFB8,NDUFS4,OGDHL
melanosome	4	0.00047	HSP90AA1,HSPA8,RAB7A,YWHAZ
inner mitochondrial membrane protein complex	4	0.00084	NDUFB4,NDUFB8,NDUFS4,PAM16
ruffle	4	0.0019	ACTN1,HSP90AA1,MYH9,NME1
vacuolar lumen	4	0.0022	ARG1,HSP90AA1,HSPA8,MAPK1
extrinsic component of membrane	4	0.0077	ANXA1,DNAJA3,PAM16,RAB7A
endocytic vesicle	4	0.0097	HSP90AA1,RAB7A,STXBP1,VIM
neuronal cell body	4	0.0408	ARG1,GOT2,HSP90AA1,MAPK1
extrinsic component of organelle membrane	3	0.00037	ANXA1,PAM16,RAB7A
mitochondrial nucleoid	3	0.00073	DNAJA3,LRPPRC,LRRC59
mitochondrial respiratory chain complex I	3	0.00084	NDUFB4,NDUFB8,NDUFS4
phagocytic vesicle	3	0.009	RAB7A,STXBP1,VIM
focal adhesion	3	0.011	ACTN1,MAPK1,MYH9
organelle outer membrane	3	0.0281	ARG1,LRPPRC,NME1
late endosome	3	0.0375	HSPA8,MAPK1,RAB7A
STRING REACTOME
Metabolism	15	0.00085	ALDH9A1,ARG1,DBI,ENO1,GOT2,GSTP1,HSP90AA1,LRPPRC,NDUFB4,NDUFB8,NDUFS4,NME1,OXCT1,RPL3,STXBP1
Immune System	12	0.0076	ANXA1,ARG1,EEF2,GSTP1,HSP90AA1,HSPA8,MAPK1,MYH9,PKM,RAB7A,VIM,YWHAZ
Innate Immune System	9	0.0064	ARG1,EEF2,GSTP1,HSP90AA1,HSPA8,MAPK1,MYH9,PKM,RAB7A
Neutrophil degranulation	8	0.00085	ARG1,EEF2,GSTP1,HSP90AA1,HSPA8,MAPK1,PKM,RAB7A
Signaling by Interleukins	6	0.0076	ANXA1,HSP90AA1,HSPA8,MAPK1,VIM,YWHAZ
Vesicle-mediated transport	6	0.0197	HSP90AA1,HSPA8,MYH9,RAB7A,YWHAH,YWHAZ
Axon guidance	5	0.0392	HSP90AA1,HSPA8,MAPK1,MYH9,RPL3
Respiratory electron transport	4	0.005	LRPPRC,NDUFB4,NDUFB8,NDUFS4
Interleukin-4 and Interleukin-13 signaling	4	0.005	ANXA1,HSP90AA1,HSPA8,VIM
RHO GTPase Effectors	4	0.0221	MAPK1,MYH9,YWHAH,YWHAZ
Metabolism of amino acids and derivatives	4	0.0457	ALDH9A1,ARG1,GOT2,RPL3
Regulation of actin dynamics for phagocytic cup formation	3	0.0076	HSP90AA1,MAPK1,MYH9
RHO GTPases activate PKNs	3	0.0076	MYH9,YWHAH,YWHAZ
Complex I biogenesis	3	0.0076	NDUFB4,NDUFB8,NDUFS4
Translocation of SLC2A4 (GLUT4) to the plasma membrane	3	0.0088	MYH9,YWHAH,YWHAZ
Cellular response to heat stress	3	0.0107	HSP90AA1,HSPA8,MAPK1
TP53 Regulates Metabolic Genes	3	0.0107	LRPPRC,YWHAH,YWHAZ
Protein localization	3	0.0211	IDE,NDUFB8,PAM16
Apoptosis	3	0.0392	VIM,YWHAH,YWHAZ
ns-ZrOx Up Down + Glass Only
STRING KEGG
Term description	Counts	FDR	Genes
Citrate cycle (TCA cycle)	16	8.35e-22	ACLY,CS,DLD,FH,IDH2,IDH3A,IDH3B,MDH2,OGDH,PC,PCK2,PDHA1,PDHB,SDHA,SUCLG1,SUCLG2
Parkinson's disease	19	1.1e-16	ATP5A1,ATP5B,ATP5C1,ATP5D,ATP5H,COX6B1,MT-CO2,NDUFA12,NDUFA13,NDUFA4,NDUFS2,NDUFV1,NDUFV2,SDHA,SLC25A5,SLC25A6,UQCRQ,VDAC1,VDAC3
Metabolic pathways	42	1.34e-16	ACLY,ALDH18A1,ATP5A1,ATP5B,ATP5C1,ATP5D,ATP5H,COX6B1,CS,DHRS4,DLD,FH,GANAB,GLUD1,HADH,IDH2,IDH3A,IDH3B,IVD,MAOB,MDH2,MT-CO2,NDUFA12,NDUFA13,NDUFA4,NDUFS2,NDUFV1,NDUFV2,NFS1,NNT,OAT,OGDH,PC,PCCB,PCK2,PDHA1,PDHB,RPN2,SDHA,SUCLG1,SUCLG2,UQCRQ
Huntington's disease	19	1.01e-14	ATP5A1,ATP5B,ATP5C1,ATP5D,ATP5H,COX6B1,MT-CO2,NDUFA12,NDUFA13,NDUFA4,NDUFS2,NDUFV1,NDUFV2,SDHA,SLC25A5,SLC25A6,UQCRQ,VDAC1,VDAC3
Carbon metabolism	16	1.63e-14	CS,DLD,FH,GLUD1,IDH2,IDH3A,IDH3B,MDH2,OGDH,PC,PCCB,PDHA1,PDHB,SDHA,SUCLG1,SUCLG2
Oxidative phosphorylation	15	1.25e-12	ATP5A1,ATP5B,ATP5C1,ATP5D,ATP5H,COX6B1,MT-CO2,NDUFA12,NDUFA13,NDUFA4,NDUFS2,NDUFV1,NDUFV2,SDHA,UQCRQ
Ribosome	15	1.25e-12	MRPL12,RPL10A,RPL13,RPL23,RPL34,RPL4,RPL5,RPL6,RPL8,RPLP2,RPS14,RPS15A,RPS16,RPS18,RPS8
Alzheimer's disease	15	2.91e-11	ATP5A1,ATP5B,ATP5C1,ATP5D,ATP5H,COX6B1,MT-CO2,NDUFA12,NDUFA13,NDUFA4,NDUFS2,NDUFV1,NDUFV2,SDHA,UQCRQ
Thermogenesis	16	1.39e-10	ATP5A1,ATP5B,ATP5C1,ATP5D,ATP5H,COA3,COX6B1,MT-CO2,NDUFA12,NDUFA13,NDUFA4,NDUFS2,NDUFV1,NDUFV2,SDHA,UQCRQ
Pyruvate metabolism	7	2.96e-07	DLD,FH,MDH2,PC,PCK2,PDHA1,PDHB
Non-alcoholic fatty liver disease (NAFLD)	10	1.49e-06	COX6B1,MT-CO2,NDUFA12,NDUFA13,NDUFA4,NDUFS2,NDUFV1,NDUFV2,SDHA,UQCRQ
Protein processing in endoplasmic reticulum	10	2.69e-06	CALR,DNAJA1,GANAB,HSP90B1,HSPA5,HYOU1,P4HB,PDIA3,RPN2,RRBP1
2-Oxocarboxylic acid metabolism	4	0.0001	CS,IDH2,IDH3A,IDH3B
Biosynthesis of amino acids	6	0.00013	ALDH18A1,CS,IDH2,IDH3A,IDH3B,PC
Necroptosis	8	0.00013	AIFM1,GLUD1,PARP1,PGAM5,SLC25A5,SLC25A6,VDAC1,VDAC3
Glyoxylate and dicarboxylate metabolism	4	0.00048	CS,DLD,MDH2,PCCB
Retrograde endocannabinoid signaling	7	0.00066	GNB1,NDUFA12,NDUFA13,NDUFA4,NDUFS2,NDUFV1,NDUFV2
Propanoate metabolism	4	0.00068	DLD,PCCB,SUCLG1,SUCLG2
Valine, leucine and isoleucine degradation	4	0.0027	DLD,HADH,IVD,PCCB
Glycolysis / Gluconeogenesis	4	0.0088	DLD,PCK2,PDHA1,PDHB
Glycine, serine and threonine metabolism	3	ENSP00000205402,ENSP00000367309,ENSP00000371110	DLD,GCAT,MAOB
Tryptophan metabolism	3	0.017	HADH,MAOB,OGDH
Arginine and proline metabolism	3	0.0263	ALDH18A1,MAOB,OAT
Cholesterol metabolism	3	0.0263	VAPB,VDAC1,VDAC3
STRING PROCESS
Term description	Counts	FDR	Genes
cellular process	125	7.47e-07	ACLY,AIFM1,ALDH18A1,ATP13A1,ATP5A1,ATP5B,ATP5C1,ATP5D,ATP5H,BCKDK,CALR,CHCHD3,CLPX,CNPY2,COA3,COX6B1,CS,DHRS4,DLD,DNAJA1,EEF1B2,EEF1G,ESYT1,ETFA,ETFB,ETFDH,FH,FKBP2,GANAB,GCAT,GDAP1,GLUD1,GNB1,GNB2L1,GPD2,GRPEL1,HADH,HNRNPK,HSP90B1,HSPA5,HSPA9,HSPD1,HYOU1,IDH2,IDH3A,IDH3B,IMMT,IVD,LETM1,MAOB,MDH2,MLEC,MPC1,MRPL12,MRPL48,MT-CO2,MYL6,NDUFA12,NDUFA13,NDUFA4,NDUFS2,NDUFV1,NDUFV2,NFS1,NNT,NT5DC2,OAT,O…
metabolic process	102	3.95e-09	ACLY,AIFM1,ALDH18A1,ATP5A1,ATP5B,ATP5C1,ATP5D,ATP5H,BCKDK,CALR,CHCHD3,CLPX,COX6B1,CS,DHRS4,DLD,EEF1B2,EEF1G,ETFA,ETFB,ETFDH,FH,FKBP2,GANAB,GCAT,GDAP1,GLUD1,GNB2L1,GPD2,HADH,HNRNPK,HSP90B1,HSPA5,HSPA9,HSPD1,IDH2,IDH3A,IDH3B,IVD,MAOB,MDH2,MLEC,MPC1,MRPL12,MRPL48,MT-CO2,NDUFA12,NDUFA13,NDUFA4,NDUFS2,NDUFV1,NDUFV2,NFS1,NNT,NT5DC2,OAT,OGDH,OPA1,P4HB,PARP1,PC,PCCB,PCK2,PDHA1,PDHB,PDIA3,PGAM5,PHB2,PPIB,…
primary metabolic process	94	1.07e-07	ACLY,ALDH18A1,ATP5A1,ATP5B,ATP5C1,ATP5D,ATP5H,BCKDK,CALR,CHCHD3,CLPX,CS,DHRS4,DLD,EEF1B2,EEF1G,ETFA,ETFB,ETFDH,FH,FKBP2,GANAB,GCAT,GLUD1,GNB2L1,GPD2,HADH,HNRNPK,HSP90B1,HSPA5,HSPD1,IDH2,IDH3A,IDH3B,IVD,MDH2,MLEC,MPC1,MRPL12,MRPL48,MT-CO2,NDUFA12,NDUFA4,NDUFS2,NDUFV1,NDUFV2,NFS1,NNT,OAT,OGDH,OPA1,P4HB,PARP1,PC,PCCB,PCK2,PDHA1,PDHB,PDIA3,PGAM5,PHB2,PPIB,PRDX3,PRDX4,PRDX5,RAB3D,RARS,RPL10A,RPL13,RPL…
nitrogen compound metabolic process	83	9.71e-05	ACLY,ALDH18A1,ATP5A1,ATP5B,ATP5C1,ATP5D,ATP5H,BCKDK,CALR,CHCHD3,CLPX,DLD,EEF1B2,EEF1G,FKBP2,GANAB,GCAT,GDAP1,GLUD1,GNB2L1,GPD2,HNRNPK,HSP90B1,HSPA5,HSPD1,IDH2,IVD,MAOB,MDH2,MPC1,MRPL12,MRPL48,MT-CO2,NDUFA12,NDUFA4,NDUFS2,NDUFV1,NDUFV2,NFS1,NNT,OAT,OGDH,OPA1,P4HB,PARP1,PC,PCCB,PDHA1,PDHB,PDIA3,PGAM5,PHB2,PPIB,PRDX3,PRDX4,PRDX5,RAB3D,RARS,RPL10A,RPL13,RPL23,RPL34,RPL4,RPL5,RPL6,RPL8,RPLP2,RPN2,RPS1…
organonitrogen compound metabolic process	80	1.79e-13	ACLY,ALDH18A1,ATP5A1,ATP5B,ATP5C1,ATP5D,ATP5H,BCKDK,CALR,CLPX,DLD,EEF1B2,EEF1G,FKBP2,GANAB,GCAT,GDAP1,GLUD1,GNB2L1,GPD2,HSP90B1,HSPA5,HSPD1,IDH2,IVD,MAOB,MDH2,MPC1,MRPL12,MRPL48,MT-CO2,NDUFA12,NDUFA4,NDUFS2,NDUFV1,NDUFV2,NFS1,NNT,OAT,OGDH,OPA1,P4HB,PARP1,PC,PCCB,PDHA1,PDHB,PDIA3,PGAM5,PPIB,PRDX3,PRDX4,PRDX5,RAB3D,RARS,RPL10A,RPL13,RPL23,RPL34,RPL4,RPL5,RPL6,RPL8,RPLP2,RPN2,RPS14,RPS15A,RPS16,RPS1…
localization	62	2.02e-05	ACLY,ATP13A1,ATP5A1,ATP5B,ATP5C1,ATP5D,ATP5H,CALR,COX6B1,DHRS4,DNAJA1,ESYT1,GDAP1,GRPEL1,HSP90B1,HSPA5,HSPA9,HSPD1,HYOU1,LETM1,MLEC,MPC1,MT-CO2,NDUFA13,NDUFA4,NNT,OGDH,OPA1,PHB2,PRDX4,RAB10,RAB3D,RPL10A,RPL13,RPL23,RPL34,RPL4,RPL5,RPL6,RPL8,RPLP2,RPS14,RPS15A,RPS16,RPS18,RPS8,RRBP1,SAMM50,SCARB2,SFXN3,SLC25A25,SLC25A5,SLC25A6,TIMM17A,TIMM23B,TIMM8B,TMED10,TOMM20,TUBB,VAPB,VDAC1,VDAC3
transport	61	8.21e-09	ACLY,ATP13A1,ATP5A1,ATP5B,ATP5C1,ATP5D,ATP5H,CALR,COX6B1,DHRS4,DNAJA1,ESYT1,GDAP1,GRPEL1,HSP90B1,HSPA5,HSPA9,HSPD1,HYOU1,LETM1,MLEC,MPC1,MT-CO2,NDUFA13,NDUFA4,NNT,OPA1,PHB2,PRDX4,RAB10,RAB3D,RPL10A,RPL13,RPL23,RPL34,RPL4,RPL5,RPL6,RPL8,RPLP2,RPS14,RPS15A,RPS16,RPS18,RPS8,RRBP1,SAMM50,SCARB2,SFXN3,SLC25A25,SLC25A5,SLC25A6,TIMM17A,TIMM23B,TIMM8B,TMED10,TOMM20,TUBB,VAPB,VDAC1,VDAC3
cellular nitrogen compound metabolic process	60	5e-05	ACLY,ATP5A1,ATP5B,ATP5C1,ATP5D,ATP5H,CHCHD3,CLPX,DLD,EEF1B2,EEF1G,GDAP1,GNB2L1,GPD2,HNRNPK,HSPD1,IDH2,MDH2,MPC1,MRPL12,MRPL48,MT-CO2,NDUFA12,NDUFA4,NDUFS2,NDUFV1,NDUFV2,NFS1,NNT,OGDH,OPA1,PARP1,PC,PCCB,PDHA1,PDHB,PHB2,PRDX5,RARS,RPL10A,RPL13,RPL23,RPL34,RPL4,RPL5,RPL6,RPL8,RPLP2,RPS14,RPS15A,RPS16,RPS18,RPS8,RRBP1,SDHA,SLC25A25,SUCLG2,TUFM,UBE2N,UQCRQ
heterocycle metabolic process	55	0.00018	ACLY,ALDH18A1,ATP5A1,ATP5B,ATP5C1,ATP5D,ATP5H,CHCHD3,CLPX,DLD,GPD2,HNRNPK,HSPD1,IDH2,MDH2,MPC1,MRPL12,MT-CO2,NDUFA12,NDUFA4,NDUFS2,NDUFV1,NDUFV2,NFS1,NNT,OAT,OGDH,OPA1,PARP1,PC,PCCB,PDHA1,PDHB,PHB2,PRDX5,RARS,RPL10A,RPL13,RPL23,RPL34,RPL4,RPL5,RPL6,RPL8,RPLP2,RPS14,RPS15A,RPS16,RPS18,RPS8,SDHA,SLC25A25,SUCLG2,UBE2N,UQCRQ
cellular component organization or biogenesis	55	0.0043	AIFM1,ATP5A1,ATP5B,ATP5C1,ATP5D,ATP5H,CALR,CHCHD3,COA3,DHRS4,GDAP1,GNB1,GRPEL1,HSP90B1,HSPA9,HSPD1,IMMT,LETM1,MRPL12,MRPL48,NDUFA12,NDUFA13,NDUFS2,NDUFV1,NDUFV2,NFS1,OAT,OPA1,P4HB,PARP1,PHB2,PRDX3,PRDX4,RAB10,RPL10A,RPL23,RPL34,RPL5,RPL6,RPS14,RPS16,RPS18,RPS8,SAMM50,SCARB2,SLC25A5,SLC25A6,TIMM17A,TIMM23B,TIMM8B,TMED10,TOMM20,TUBB,UBE2N,VAPB
cellular aromatic compound metabolic process	52	0.0017	ACLY,ATP5A1,ATP5B,ATP5C1,ATP5D,ATP5H,CHCHD3,CLPX,DLD,GPD2,HNRNPK,HSPD1,IDH2,MAOB,MDH2,MPC1,MRPL12,MT-CO2,NDUFA12,NDUFA4,NDUFS2,NDUFV1,NDUFV2,NFS1,NNT,OGDH,OPA1,PARP1,PDHA1,PDHB,PHB2,PRDX5,RARS,RPL10A,RPL13,RPL23,RPL34,RPL4,RPL5,RPL6,RPL8,RPLP2,RPS14,RPS15A,RPS16,RPS18,RPS8,SDHA,SLC25A25,SUCLG2,UBE2N,UQCRQ
nucleobase-containing compound metabolic process	51	0.0011	ACLY,ATP5A1,ATP5B,ATP5C1,ATP5D,ATP5H,CHCHD3,CLPX,DLD,GPD2,HNRNPK,HSPD1,IDH2,MDH2,MPC1,MRPL12,MT-CO2,NDUFA12,NDUFA4,NDUFS2,NDUFV1,NDUFV2,NFS1,NNT,OGDH,OPA1,PARP1,PDHA1,PDHB,PHB2,PRDX5,RARS,RPL10A,RPL13,RPL23,RPL34,RPL4,RPL5,RPL6,RPL8,RPLP2,RPS14,RPS15A,RPS16,RPS18,RPS8,SDHA,SLC25A25,SUCLG2,UBE2N,UQCRQ
biosynthetic process	50	0.0046	ACLY,ALDH18A1,ATP5A1,ATP5B,ATP5C1,ATP5D,ATP5H,CHCHD3,DLD,EEF1B2,EEF1G,GCAT,GLUD1,GNB2L1,GPD2,HNRNPK,IDH2,MAOB,MDH2,MPC1,MRPL12,MRPL48,NFS1,OAT,OGDH,PARP1,PC,PCK2,PDHA1,PDHB,PHB2,RARS,RPL10A,RPL13,RPL23,RPL34,RPL4,RPL5,RPL6,RPL8,RPLP2,RPN2,RPS14,RPS15A,RPS16,RPS18,RPS8,RRBP1,TUFM,VAPB
cellular component organization	50	0.0265	AIFM1,ATP5A1,ATP5B,ATP5C1,ATP5D,ATP5H,CALR,CHCHD3,COA3,DHRS4,GDAP1,GNB1,GRPEL1,HSP90B1,HSPA9,HSPD1,IMMT,LETM1,MRPL12,MRPL48,NDUFA12,NDUFA13,NDUFS2,NDUFV1,NDUFV2,NFS1,OAT,OPA1,P4HB,PARP1,PHB2,PRDX3,PRDX4,RAB10,RPL23,RPL5,RPL6,RPS14,SAMM50,SCARB2,SLC25A5,SLC25A6,TIMM17A,TIMM23B,TIMM8B,TMED10,TOMM20,TUBB,UBE2N,VAPB
organic substance biosynthetic process	48	0.0106	ACLY,ALDH18A1,ATP5A1,ATP5B,ATP5C1,ATP5D,ATP5H,CHCHD3,DLD,EEF1B2,EEF1G,GLUD1,GNB2L1,GPD2,HNRNPK,IDH2,MDH2,MPC1,MRPL12,MRPL48,NFS1,OAT,OGDH,PARP1,PC,PCK2,PDHA1,PDHB,PHB2,RARS,RPL10A,RPL13,RPL23,RPL34,RPL4,RPL5,RPL6,RPL8,RPLP2,RPN2,RPS14,RPS15A,RPS16,RPS18,RPS8,RRBP1,TUFM,VAPB
cellular localization	45	2.18e-10	ATP5A1,ATP5B,ATP5C1,ATP5D,ATP5H,CALR,DHRS4,DNAJA1,ESYT1,GDAP1,GRPEL1,HSP90B1,HSPA5,HSPA9,HSPD1,HYOU1,LETM1,NDUFA13,OPA1,PHB2,RAB10,RPL10A,RPL13,RPL23,RPL34,RPL4,RPL5,RPL6,RPL8,RPLP2,RPS14,RPS15A,RPS16,RPS18,RPS8,SAMM50,SCARB2,SLC25A6,TIMM17A,TIMM23B,TIMM8B,TMED10,TOMM20,TUBB,VAPB
protein metabolic process	45	0.0076	BCKDK,CALR,CLPX,DLD,EEF1B2,EEF1G,FKBP2,GANAB,GNB2L1,HSP90B1,HSPA5,HSPD1,MDH2,MRPL12,MRPL48,NFS1,OGDH,P4HB,PARP1,PDIA3,PGAM5,PPIB,PRDX3,PRDX4,RAB3D,RARS,RPL10A,RPL13,RPL23,RPL34,RPL4,RPL5,RPL6,RPL8,RPLP2,RPN2,RPS14,RPS15A,RPS16,RPS18,RPS8,RRBP1,TOMM20,TUFM,UBE2N
oxidation-reduction process	41	3.12e-19	AIFM1,ALDH18A1,COX6B1,CS,DHRS4,DLD,ETFA,ETFB,ETFDH,FH,GLUD1,GPD2,HADH,IDH2,IDH3A,IDH3B,IVD,MAOB,MDH2,MT-CO2,NDUFA12,NDUFA13,NDUFA4,NDUFS2,NDUFV1,NDUFV2,NNT,OGDH,P4HB,PDHA1,PDHB,PDIA3,PRDX3,PRDX4,PRDX5,SDHA,SLC25A25,SUCLG1,SUCLG2,TXN2,UQCRQ
intracellular transport	41	6.77e-14	ATP5A1,ATP5B,ATP5C1,ATP5D,ATP5H,CALR,DHRS4,GDAP1,GRPEL1,HSP90B1,HSPA9,HSPD1,HYOU1,NDUFA13,OPA1,PHB2,RAB10,RPL10A,RPL13,RPL23,RPL34,RPL4,RPL5,RPL6,RPL8,RPLP2,RPS14,RPS15A,RPS16,RPS18,RPS8,SAMM50,SCARB2,SLC25A6,TIMM17A,TIMM23B,TIMM8B,TMED10,TOMM20,TUBB,VAPB
organonitrogen compound biosynthetic process	40	1.79e-13	ACLY,ALDH18A1,ATP5A1,ATP5B,ATP5C1,ATP5D,ATP5H,DLD,EEF1B2,EEF1G,GLUD1,GNB2L1,IDH2,MPC1,MRPL12,MRPL48,NFS1,OAT,OGDH,PDHA1,PDHB,RARS,RPL10A,RPL13,RPL23,RPL34,RPL4,RPL5,RPL6,RPL8,RPLP2,RPN2,RPS14,RPS15A,RPS16,RPS18,RPS8,RRBP1,TUFM,VAPB
organelle organization	40	0.00064	AIFM1,ATP5A1,ATP5B,ATP5C1,ATP5D,ATP5H,CALR,CHCHD3,COA3,DHRS4,GDAP1,GRPEL1,HSP90B1,HSPD1,IMMT,LETM1,NDUFA12,NDUFA13,NDUFS2,NDUFV1,NDUFV2,OPA1,PARP1,PHB2,PRDX3,RAB10,RPL5,RPL6,RPS14,SAMM50,SLC25A5,SLC25A6,TIMM17A,TIMM23B,TIMM8B,TMED10,TOMM20,TUBB,UBE2N,VAPB
organic substance transport	39	6.17e-08	CALR,DHRS4,ESYT1,GDAP1,GRPEL1,HSP90B1,HSPA9,HSPD1,MPC1,NDUFA13,PHB2,RAB10,RAB3D,RPL10A,RPL13,RPL23,RPL34,RPL4,RPL5,RPL6,RPL8,RPLP2,RPS14,RPS15A,RPS16,RPS18,RPS8,RRBP1,SAMM50,SCARB2,SLC25A25,SLC25A5,SLC25A6,TIMM17A,TIMM23B,TIMM8B,TMED10,TOMM20,VDAC3
regulation of biological quality	39	0.0118	ATP13A1,ATP5B,CALR,DHRS4,DLD,FH,GCAT,GLUD1,GNB1,GNB2L1,HADH,HSP90B1,HSPA5,HSPA9,HSPD1,IMMT,LETM1,MAOB,MT-CO2,NNT,OPA1,P4HB,PARP1,PDIA3,PHB2,PPIB,PRDX3,PRDX4,PRDX5,RAB3D,RPL23,RPL5,RPS14,SCARB2,SFXN3,SLC25A5,SLC25A6,TXN2,VAPB
drug metabolic process	38	6.88e-22	ACLY,ALDH18A1,ATP5A1,ATP5B,ATP5C1,ATP5D,ATP5H,CLPX,CS,DLD,FH,GCAT,IDH2,IDH3A,IDH3B,MAOB,MDH2,MT-CO2,NDUFA12,NDUFA4,NDUFS2,NDUFV1,NDUFV2,NNT,OAT,OGDH,PARP1,PC,PCCB,PDHA1,PDHB,PRDX3,PRDX5,SDHA,SLC25A25,SUCLG1,SUCLG2,UQCRQ
cellular nitrogen compound biosynthetic process	38	0.0178	ACLY,ATP5A1,ATP5B,ATP5C1,ATP5D,ATP5H,CHCHD3,DLD,EEF1B2,EEF1G,GNB2L1,HNRNPK,IDH2,MPC1,MRPL12,MRPL48,OGDH,PARP1,PDHA1,PDHB,PHB2,RARS,RPL10A,RPL13,RPL23,RPL34,RPL4,RPL5,RPL6,RPL8,RPLP2,RPS14,RPS15A,RPS16,RPS18,RPS8,RRBP1,TUFM
nitrogen compound transport	37	5.12e-09	CALR,DHRS4,GDAP1,GRPEL1,HSP90B1,HSPA9,HSPD1,NDUFA13,PHB2,RAB10,RAB3D,RPL10A,RPL13,RPL23,RPL34,RPL4,RPL5,RPL6,RPL8,RPLP2,RPS14,RPS15A,RPS16,RPS18,RPS8,RRBP1,SAMM50,SCARB2,SLC25A25,SLC25A5,SLC25A6,TIMM17A,TIMM23B,TIMM8B,TMED10,TOMM20,VDAC3
macromolecule localization	37	7.63e-06	CALR,DHRS4,DNAJA1,ESYT1,GDAP1,GRPEL1,HSP90B1,HSPA5,HSPA9,HSPD1,NDUFA13,PHB2,RAB10,RAB3D,RPL10A,RPL13,RPL23,RPL34,RPL4,RPL5,RPL6,RPL8,RPLP2,RPS14,RPS15A,RPS16,RPS18,RPS8,RRBP1,SAMM50,SCARB2,SLC25A6,TIMM17A,TIMM23B,TIMM8B,TMED10,TOMM20
protein localization	36	8.05e-07	CALR,DHRS4,DNAJA1,GDAP1,GRPEL1,HSP90B1,HSPA5,HSPA9,HSPD1,NDUFA13,PHB2,RAB10,RAB3D,RPL10A,RPL13,RPL23,RPL34,RPL4,RPL5,RPL6,RPL8,RPLP2,RPS14,RPS15A,RPS16,RPS18,RPS8,RRBP1,SAMM50,SCARB2,SLC25A6,TIMM17A,TIMM23B,TIMM8B,TMED10,TOMM20
phosphate-containing compound metabolic process	36	2.58e-06	ACLY,ALDH18A1,ATP5A1,ATP5B,ATP5C1,ATP5D,ATP5H,BCKDK,CLPX,DLD,GPD2,IDH2,MDH2,MPC1,MT-CO2,NDUFA12,NDUFA4,NDUFS2,NDUFV1,NDUFV2,NFS1,NNT,NT5DC2,OGDH,OPA1,PARP1,PDHA1,PDHB,PGAM5,PRDX4,PRDX5,SDHA,SLC25A25,SUCLG2,UBE2N,UQCRQ
carboxylic acid metabolic process	34	1.19e-14	ACLY,ALDH18A1,BCKDK,CS,DLD,ETFA,ETFB,ETFDH,FH,GCAT,GLUD1,HADH,IDH2,IDH3A,IDH3B,IVD,MDH2,MPC1,NFS1,NNT,OAT,OGDH,P4HB,PC,PCCB,PDHA1,PDHB,PRDX4,RARS,SCARB2,SDHA,SUCLG1,SUCLG2,TXN2
cellular protein localization	34	1.47e-09	CALR,DHRS4,DNAJA1,GDAP1,GRPEL1,HSP90B1,HSPA5,HSPA9,HSPD1,NDUFA13,PHB2,RAB10,RPL10A,RPL13,RPL23,RPL34,RPL4,RPL5,RPL6,RPL8,RPLP2,RPS14,RPS15A,RPS16,RPS18,RPS8,SAMM50,SCARB2,SLC25A6,TIMM17A,TIMM23B,TIMM8B,TMED10,TOMM20
protein transport	34	2.26e-09	CALR,DHRS4,GDAP1,GRPEL1,HSP90B1,HSPA9,HSPD1,NDUFA13,PHB2,RAB10,RAB3D,RPL10A,RPL13,RPL23,RPL34,RPL4,RPL5,RPL6,RPL8,RPLP2,RPS14,RPS15A,RPS16,RPS18,RPS8,RRBP1,SAMM50,SCARB2,SLC25A6,TIMM17A,TIMM23B,TIMM8B,TMED10,TOMM20
cellular catabolic process	34	1.27e-07	BCKDK,CLPX,ETFA,ETFB,ETFDH,GCAT,GLUD1,GPD2,HADH,HSP90B1,HSPA5,IVD,MAOB,OGDH,PCCB,PGAM5,PRDX3,PRDX5,RPL10A,RPL13,RPL23,RPL34,RPL4,RPL5,RPL6,RPL8,RPLP2,RPS14,RPS15A,RPS16,RPS18,RPS8,TXN2,VDAC1
generation of precursor metabolites and energy	33	1.73e-22	ATP5A1,ATP5B,ATP5C1,ATP5D,ATP5H,COX6B1,CS,DLD,ETFA,ETFB,ETFDH,FH,GPD2,IDH2,IDH3A,IDH3B,MAOB,MDH2,MT-CO2,NDUFA12,NDUFA4,NDUFS2,NDUFV1,NDUFV2,NNT,OGDH,PDHA1,PDHB,SDHA,SLC25A25,SUCLG1,SUCLG2,UQCRQ
cellular amide metabolic process	32	9.73e-15	ACLY,DLD,EEF1B2,EEF1G,GDAP1,GNB2L1,MPC1,MRPL12,MRPL48,OGDH,PC,PCCB,PDHA1,PDHB,RARS,RPL10A,RPL13,RPL23,RPL34,RPL4,RPL5,RPL6,RPL8,RPLP2,RPS14,RPS15A,RPS16,RPS18,RPS8,RRBP1,SUCLG2,TUFM
response to organic substance	32	0.0187	AIFM1,CALR,DNAJA1,EEF1B2,GDAP1,GNB1,GNB2L1,HADH,HSP90B1,HSPA5,HSPA9,HSPD1,HYOU1,MAOB,MPC1,NDUFA13,OPA1,P4HB,PARP1,PHB2,PRDX3,RAB10,RPL10A,RPL23,RPL8,SLC25A5,TMED10,TOMM20,TUFM,TXN2,UBE2N,VAPB
protein localization to organelle	31	3.24e-15	CALR,DHRS4,DNAJA1,GDAP1,GRPEL1,HSPA5,HSPD1,NDUFA13,PHB2,RAB10,RPL10A,RPL13,RPL23,RPL34,RPL4,RPL5,RPL6,RPL8,RPLP2,RPS14,RPS15A,RPS16,RPS18,RPS8,SAMM50,SCARB2,SLC25A6,TIMM17A,TIMM23B,TIMM8B,TOMM20
intracellular protein transport	31	9.18e-13	CALR,DHRS4,GDAP1,GRPEL1,HSP90B1,HSPA9,HSPD1,NDUFA13,PHB2,RPL10A,RPL13,RPL23,RPL34,RPL4,RPL5,RPL6,RPL8,RPLP2,RPS14,RPS15A,RPS16,RPS18,RPS8,SAMM50,SCARB2,SLC25A6,TIMM17A,TIMM23B,TIMM8B,TMED10,TOMM20
cellular component biogenesis	31	0.0093	AIFM1,CALR,COA3,DHRS4,GNB1,HSP90B1,HSPA9,HSPD1,LETM1,NDUFA12,NDUFA13,NDUFS2,NDUFV1,NDUFV2,NFS1,OAT,OPA1,P4HB,PARP1,RPL10A,RPL34,RPL5,RPL6,RPS14,RPS16,RPS18,RPS8,SAMM50,TMED10,TOMM20,TUBB
nucleotide metabolic process	30	1.4e-15	ACLY,ATP5A1,ATP5B,ATP5C1,ATP5D,ATP5H,CLPX,DLD,GPD2,IDH2,MDH2,MPC1,MT-CO2,NDUFA12,NDUFA4,NDUFS2,NDUFV1,NDUFV2,NFS1,NNT,OGDH,OPA1,PARP1,PDHA1,PDHB,PRDX5,SDHA,SLC25A25,SUCLG2,UQCRQ
organic substance catabolic process	30	8.62e-06	BCKDK,CLPX,ETFA,ETFB,ETFDH,GCAT,GLUD1,GPD2,HADH,HSP90B1,HSPA5,IVD,MAOB,OGDH,PCCB,RPL10A,RPL13,RPL23,RPL34,RPL4,RPL5,RPL6,RPL8,RPLP2,RPS14,RPS15A,RPS16,RPS18,RPS8,TXN2
mitochondrion organization	29	8.26e-18	AIFM1,ATP5A1,ATP5B,ATP5C1,ATP5D,ATP5H,CHCHD3,COA3,GDAP1,GRPEL1,HSPD1,IMMT,LETM1,NDUFA12,NDUFA13,NDUFS2,NDUFV1,NDUFV2,OPA1,PARP1,PHB2,PRDX3,SAMM50,SLC25A5,SLC25A6,TIMM17A,TIMM23B,TIMM8B,TOMM20
establishment of protein localization to organelle	28	1.41e-17	DHRS4,GDAP1,GRPEL1,HSPD1,NDUFA13,PHB2,RAB10,RPL10A,RPL13,RPL23,RPL34,RPL4,RPL5,RPL6,RPL8,RPLP2,RPS14,RPS15A,RPS16,RPS18,RPS8,SAMM50,SCARB2,SLC25A6,TIMM17A,TIMM23B,TIMM8B,TOMM20
carbohydrate derivative metabolic process	28	3.84e-08	ACLY,ATP5A1,ATP5B,ATP5C1,ATP5D,ATP5H,CLPX,DLD,GANAB,GPD2,MPC1,MT-CO2,NDUFA12,NDUFA4,NDUFS2,NDUFV1,NDUFV2,NFS1,OGDH,OPA1,PARP1,PDHA1,PDHB,RPN2,SDHA,SLC25A25,SUCLG2,UQCRQ
amide biosynthetic process	27	1.79e-14	ACLY,DLD,EEF1B2,EEF1G,GNB2L1,MPC1,MRPL12,MRPL48,PDHA1,PDHB,RARS,RPL10A,RPL13,RPL23,RPL34,RPL4,RPL5,RPL6,RPL8,RPLP2,RPS14,RPS15A,RPS16,RPS18,RPS8,RRBP1,TUFM
transmembrane transport	27	1.99e-06	ATP13A1,ATP5A1,ATP5B,ATP5C1,ATP5D,ATP5H,COX6B1,GRPEL1,HSPD1,LETM1,MPC1,MT-CO2,NDUFA13,NDUFA4,NNT,OPA1,PHB2,SFXN3,SLC25A25,SLC25A5,SLC25A6,TIMM17A,TIMM23B,TIMM8B,TOMM20,VDAC1,VDAC3
protein targeting	26	1.33e-17	DHRS4,GDAP1,GRPEL1,HSPD1,NDUFA13,RPL10A,RPL13,RPL23,RPL34,RPL4,RPL5,RPL6,RPL8,RPLP2,RPS14,RPS15A,RPS16,RPS18,RPS8,SAMM50,SCARB2,SLC25A6,TIMM17A,TIMM23B,TIMM8B,TOMM20
protein-containing complex subunit organization	26	0.0019	AIFM1,CALR,COA3,DHRS4,GNB1,HSPD1,LETM1,MRPL12,MRPL48,NDUFA12,NDUFA13,NDUFS2,NDUFV1,NDUFV2,NFS1,OAT,OPA1,P4HB,PARP1,RPL23,RPL5,RPL6,RPS14,SAMM50,TMED10,TOMM20
purine ribonucleotide metabolic process	25	4.02e-14	ACLY,ATP5A1,ATP5B,ATP5C1,ATP5D,ATP5H,CLPX,DLD,MPC1,MT-CO2,NDUFA12,NDUFA4,NDUFS2,NDUFV1,NDUFV2,NFS1,OGDH,OPA1,PARP1,PDHA1,PDHB,SDHA,SLC25A25,SUCLG2,UQCRQ
cellular respiration	24	1.04e-21	CS,DLD,ETFDH,FH,GPD2,IDH2,IDH3A,IDH3B,MDH2,MT-CO2,NDUFA12,NDUFA4,NDUFS2,NDUFV1,NDUFV2,NNT,OGDH,PDHA1,PDHB,SDHA,SLC25A25,SUCLG1,SUCLG2,UQCRQ
homeostatic process	24	0.001	ATP13A1,ATP5B,CALR,DLD,FH,GNB1,GNB2L1,HSP90B1,HSPA9,IMMT,LETM1,NNT,OPA1,P4HB,PARP1,PDIA3,PRDX3,PRDX4,PRDX5,RAB3D,RPS14,SFXN3,TXN2,VAPB
negative regulation of gene expression	24	0.0044	CALR,CHCHD3,CNPY2,GNB2L1,HNRNPK,NDUFA13,PARP1,PC,PHB2,PRDX5,RPL10A,RPL13,RPL23,RPL34,RPL4,RPL5,RPL6,RPL8,RPLP2,RPS14,RPS15A,RPS16,RPS18,RPS8
peptide metabolic process	23	3.52e-11	EEF1B2,EEF1G,GDAP1,GNB2L1,MRPL12,MRPL48,RARS,RPL10A,RPL13,RPL23,RPL34,RPL4,RPL5,RPL6,RPL8,RPLP2,RPS14,RPS15A,RPS16,RPS18,RPS8,RRBP1,TUFM
response to oxygen-containing compound	23	0.0013	AIFM1,CALR,EEF1B2,GDAP1,GNB1,GNB2L1,HADH,HSP90B1,HSPA5,MAOB,NDUFA13,OPA1,PARP1,PHB2,PRDX3,PRDX5,RAB10,ROMO1,RPL10A,RPL23,TOMM20,TUFM,TXN2
protein-containing complex assembly	23	0.0029	AIFM1,CALR,COA3,DHRS4,GNB1,HSPD1,LETM1,NDUFA12,NDUFA13,NDUFS2,NDUFV1,NDUFV2,NFS1,OAT,OPA1,P4HB,PARP1,RPL5,RPL6,RPS14,SAMM50,TMED10,TOMM20
translation	22	8.83e-13	EEF1B2,EEF1G,GNB2L1,MRPL12,MRPL48,RARS,RPL10A,RPL13,RPL23,RPL34,RPL4,RPL5,RPL6,RPL8,RPLP2,RPS14,RPS15A,RPS16,RPS18,RPS8,RRBP1,TUFM
regulation of cell death	22	0.0148	AIFM1,CALR,DNAJA1,GNB2L1,HNRNPK,HSP90B1,HSPA5,HSPA9,HSPD1,HYOU1,MT-CO2,NDUFA13,NNT,OPA1,P4HB,PARP1,PDIA3,PHB2,PRDX3,PRDX5,SLC25A5,TRAP1
ion transmembrane transport	21	8.29e-05	ATP13A1,ATP5A1,ATP5B,ATP5C1,ATP5D,ATP5H,COX6B1,LETM1,MPC1,MT-CO2,NDUFA4,NNT,OPA1,PHB2,SFXN3,SLC25A25,SLC25A5,SLC25A6,TIMM8B,VDAC1,VDAC3
regulation of apoptotic process	21	0.0119	AIFM1,CALR,DNAJA1,GNB2L1,HNRNPK,HSP90B1,HSPA5,HSPA9,HSPD1,HYOU1,NDUFA13,NNT,OPA1,P4HB,PARP1,PDIA3,PHB2,PRDX3,PRDX5,SLC25A5,TRAP1
purine ribonucleoside triphosphate metabolic process	20	2.76e-14	ATP5A1,ATP5B,ATP5C1,ATP5D,ATP5H,CLPX,DLD,MT-CO2,NDUFA12,NDUFA4,NDUFS2,NDUFV1,NDUFV2,NFS1,OGDH,OPA1,PARP1,SDHA,SLC25A25,UQCRQ
mitochondrial transport	20	3.09e-14	ATP5A1,ATP5B,ATP5C1,ATP5D,ATP5H,GDAP1,GRPEL1,HSPD1,LETM1,MPC1,NDUFA13,OPA1,SAMM50,SLC25A25,SLC25A5,SLC25A6,TIMM17A,TIMM23B,TIMM8B,TOMM20
cofactor metabolic process	20	3.83e-09	ACLY,DLD,EEF1G,GDAP1,GPD2,HSPA9,IDH2,MAOB,MDH2,MPC1,NFS1,NNT,OGDH,PC,PCCB,PDHA1,PDHB,PRDX3,PRDX5,SUCLG2
membrane organization	19	1.41e-05	ATP5A1,ATP5B,ATP5C1,ATP5D,ATP5H,CALR,CHCHD3,GDAP1,IMMT,LETM1,NDUFA13,OPA1,SAMM50,SCARB2,SLC25A5,SLC25A6,TMED10,TOMM20,VAPB
phosphorylation	19	0.0079	ALDH18A1,ATP5A1,ATP5B,ATP5C1,ATP5D,ATP5H,BCKDK,DLD,MT-CO2,NDUFA12,NDUFA4,NDUFS2,NDUFV1,NDUFV2,OGDH,PRDX4,SDHA,UBE2N,UQCRQ
ATP metabolic process	18	2.39e-13	ATP5A1,ATP5B,ATP5C1,ATP5D,ATP5H,CLPX,DLD,MT-CO2,NDUFA12,NDUFA4,NDUFS2,NDUFV1,NDUFV2,OGDH,PARP1,SDHA,SLC25A25,UQCRQ
purine ribonucleoside monophosphate metabolic process	18	3.93e-12	ATP5A1,ATP5B,ATP5C1,ATP5D,ATP5H,CLPX,DLD,MT-CO2,NDUFA12,NDUFA4,NDUFS2,NDUFV1,NDUFV2,OGDH,PARP1,SDHA,SLC25A25,UQCRQ
cellular homeostasis	18	0.00018	ATP13A1,ATP5B,CALR,DLD,GNB1,GNB2L1,HSP90B1,IMMT,LETM1,NNT,OPA1,P4HB,PDIA3,PRDX3,PRDX4,PRDX5,TXN2,VAPB
antibiotic metabolic process	17	1.19e-14	ACLY,CS,FH,IDH2,IDH3A,IDH3B,MAOB,MDH2,NNT,OGDH,PDHA1,PDHB,PRDX3,PRDX5,SDHA,SUCLG1,SUCLG2
establishment of protein localization to membrane	17	1.8e-11	NDUFA13,RAB10,RPL10A,RPL13,RPL23,RPL34,RPL4,RPL5,RPL6,RPL8,RPLP2,RPS14,RPS15A,RPS16,RPS18,RPS8,SAMM50
cellular protein-containing complex assembly	17	0.00084	AIFM1,CALR,COA3,HSPD1,NDUFA12,NDUFA13,NDUFS2,NDUFV1,NDUFV2,OPA1,PARP1,RPL5,RPL6,RPS14,SAMM50,TMED10,TOMM20
cellular macromolecule catabolic process	17	0.00094	CLPX,HSP90B1,HSPA5,RPL10A,RPL13,RPL23,RPL34,RPL4,RPL5,RPL6,RPL8,RPLP2,RPS14,RPS15A,RPS16,RPS18,RPS8
response to drug	17	0.0019	AIFM1,CALR,EEF1B2,GNB1,HADH,HSP90B1,HSPA5,MAOB,OPA1,PRDX3,RPL10A,RPN2,SLC25A25,SLC25A5,SLC25A6,TUFM,TXN2
protein localization to endoplasmic reticulum	16	1.2e-13	HSPA5,RAB10,RPL10A,RPL13,RPL23,RPL34,RPL4,RPL5,RPL6,RPL8,RPLP2,RPS14,RPS15A,RPS16,RPS18,RPS8
electron transport chain	16	6.55e-12	COX6B1,DLD,ETFA,ETFB,ETFDH,GPD2,IDH3B,MAOB,MT-CO2,NDUFA12,NDUFA4,NDUFS2,NDUFV1,NDUFV2,SDHA,UQCRQ
protein folding	16	1.61e-10	CALR,CLPX,DNAJA1,FKBP2,GNB1,GRPEL1,HSP90B1,HSPA5,HSPA9,HSPD1,MLEC,P4HB,PDIA3,PPIB,PRDX4,TRAP1
aromatic compound catabolic process	16	2.76e-06	MAOB,OGDH,RPL10A,RPL13,RPL23,RPL34,RPL4,RPL5,RPL6,RPL8,RPLP2,RPS14,RPS15A,RPS16,RPS18,RPS8
organic cyclic compound catabolic process	16	6.08e-06	MAOB,OGDH,RPL10A,RPL13,RPL23,RPL34,RPL4,RPL5,RPL6,RPL8,RPLP2,RPS14,RPS15A,RPS16,RPS18,RPS8
negative regulation of cell death	16	0.0083	DNAJA1,GNB2L1,HNRNPK,HSP90B1,HSPA5,HSPA9,HSPD1,HYOU1,NDUFA13,NNT,OPA1,PHB2,PRDX3,PRDX5,SLC25A5,TRAP1
tricarboxylic acid metabolic process	15	4.31e-18	ACLY,CS,FH,GLUD1,IDH2,IDH3A,IDH3B,MDH2,NNT,OGDH,PDHA1,PDHB,SDHA,SUCLG1,SUCLG2
establishment of protein localization to endoplasmic reticulum	15	2.24e-13	RAB10,RPL10A,RPL13,RPL23,RPL34,RPL4,RPL5,RPL6,RPL8,RPLP2,RPS14,RPS15A,RPS16,RPS18,RPS8
coenzyme metabolic process	15	9.43e-08	ACLY,DLD,GPD2,IDH2,MDH2,MPC1,NFS1,NNT,OGDH,PC,PCCB,PDHA1,PDHB,PRDX5,SUCLG2
nucleobase-containing compound catabolic process	15	2.76e-06	OGDH,RPL10A,RPL13,RPL23,RPL34,RPL4,RPL5,RPL6,RPL8,RPLP2,RPS14,RPS15A,RPS16,RPS18,RPS8
monocarboxylic acid metabolic process	15	2.39e-05	ACLY,DLD,ETFA,ETFB,ETFDH,HADH,IDH2,IVD,MPC1,OGDH,PC,PCCB,PDHA1,PDHB,SCARB2
mRNA metabolic process	15	0.00083	HNRNPK,RPL10A,RPL13,RPL23,RPL34,RPL4,RPL5,RPL6,RPL8,RPLP2,RPS14,RPS15A,RPS16,RPS18,RPS8
cation transmembrane transport	15	0.0017	ATP13A1,ATP5A1,ATP5B,ATP5C1,ATP5D,ATP5H,COX6B1,LETM1,MT-CO2,NDUFA4,NNT,OPA1,PHB2,SLC25A25,TIMM8B
negative regulation of apoptotic process	15	0.0083	DNAJA1,HNRNPK,HSP90B1,HSPA5,HSPA9,HSPD1,HYOU1,NDUFA13,NNT,OPA1,PHB2,PRDX3,PRDX5,SLC25A5,TRAP1
cellular response to oxygen-containing compound	15	0.0114	AIFM1,GDAP1,GNB1,GNB2L1,HSP90B1,HSPA5,NDUFA13,OPA1,PARP1,PHB2,PRDX3,PRDX5,RAB10,ROMO1,RPL23
citrate metabolic process	14	3.62e-17	ACLY,CS,FH,IDH2,IDH3A,IDH3B,MDH2,NNT,OGDH,PDHA1,PDHB,SDHA,SUCLG1,SUCLG2
aerobic respiration	14	5.08e-14	CS,FH,IDH2,IDH3A,IDH3B,MDH2,MT-CO2,NNT,OGDH,PDHA1,PDHB,SDHA,SUCLG1,SUCLG2
mitochondrial transmembrane transport	14	2.39e-13	ATP5A1,ATP5B,ATP5C1,ATP5D,ATP5H,GRPEL1,HSPD1,LETM1,MPC1,NDUFA13,OPA1,TIMM17A,TIMM23B,TOMM20
SRP-dependent cotranslational protein targeting to membrane	14	7.96e-13	RPL10A,RPL13,RPL23,RPL34,RPL4,RPL5,RPL6,RPL8,RPLP2,RPS14,RPS15A,RPS16,RPS18,RPS8
oxidative phosphorylation	14	2e-12	ATP5A1,ATP5B,ATP5C1,ATP5D,ATP5H,DLD,MT-CO2,NDUFA12,NDUFA4,NDUFS2,NDUFV1,NDUFV2,SDHA,UQCRQ
nuclear-transcribed mRNA catabolic process, nonsense-mediated decay	14	1.35e-11	RPL10A,RPL13,RPL23,RPL34,RPL4,RPL5,RPL6,RPL8,RPLP2,RPS14,RPS15A,RPS16,RPS18,RPS8
mitochondrial membrane organization	14	2.18e-11	ATP5A1,ATP5B,ATP5C1,ATP5D,ATP5H,CHCHD3,IMMT,LETM1,NDUFA13,OPA1,SAMM50,SLC25A5,SLC25A6,TOMM20
translational initiation	14	1.23e-10	RPL10A,RPL13,RPL23,RPL34,RPL4,RPL5,RPL6,RPL8,RPLP2,RPS14,RPS15A,RPS16,RPS18,RPS8
sulfur compound metabolic process	14	3.19e-06	ACLY,DLD,EEF1G,GDAP1,HSPA9,MPC1,NFS1,OGDH,PC,PCCB,PDHA1,PDHB,SUCLG2,TXN2
inorganic cation transmembrane transport	14	0.0012	ATP13A1,ATP5A1,ATP5B,ATP5C1,ATP5D,ATP5H,COX6B1,LETM1,MT-CO2,NDUFA4,NNT,OPA1,PHB2,SLC25A25
tricarboxylic acid cycle	13	4.3e-16	CS,FH,IDH2,IDH3A,IDH3B,MDH2,NNT,OGDH,PDHA1,PDHB,SDHA,SUCLG1,SUCLG2
organophosphate biosynthetic process	13	0.0022	ACLY,ATP5A1,ATP5B,ATP5C1,ATP5D,ATP5H,DLD,IDH2,MPC1,NFS1,OGDH,PDHA1,PDHB
nucleotide biosynthetic process	12	2.03e-05	ACLY,ATP5A1,ATP5B,ATP5C1,ATP5D,ATP5H,DLD,IDH2,MPC1,OGDH,PDHA1,PDHB
carbohydrate metabolic process	12	0.0011	CS,GANAB,GPD2,IDH2,IDH3A,MDH2,MLEC,OGDH,PC,PCK2,PDHA1,PDHB
carbohydrate derivative biosynthetic process	12	0.0114	ACLY,ATP5A1,ATP5B,ATP5C1,ATP5D,ATP5H,DLD,MPC1,OGDH,PDHA1,PDHB,RPN2
inner mitochondrial membrane organization	11	2.22e-12	ATP5A1,ATP5B,ATP5C1,ATP5D,ATP5H,CHCHD3,IMMT,LETM1,NDUFA13,OPA1,SAMM50
protein localization to mitochondrion	11	5.37e-10	DNAJA1,GDAP1,GRPEL1,HSPD1,NDUFA13,SAMM50,SLC25A6,TIMM17A,TIMM23B,TIMM8B,TOMM20
respiratory electron transport chain	11	5.12e-09	DLD,ETFDH,GPD2,MT-CO2,NDUFA12,NDUFA4,NDUFS2,NDUFV1,NDUFV2,SDHA,UQCRQ
purine ribonucleotide biosynthetic process	11	2.71e-06	ACLY,ATP5A1,ATP5B,ATP5C1,ATP5D,ATP5H,DLD,MPC1,OGDH,PDHA1,PDHB
cellular amino acid metabolic process	11	0.00018	ALDH18A1,BCKDK,GCAT,GLUD1,IVD,NFS1,OAT,P4HB,PRDX4,RARS,TXN2
small molecule catabolic process	11	0.0011	BCKDK,ETFA,ETFB,ETFDH,GCAT,GLUD1,GPD2,HADH,IVD,PCCB,TXN2
regulation of apoptotic signaling pathway	11	0.0011	DNAJA1,GNB2L1,HNRNPK,HYOU1,NDUFA13,OPA1,P4HB,PARP1,PDIA3,SLC25A5,TRAP1
protein targeting to mitochondrion	10	1.1e-09	GDAP1,GRPEL1,HSPD1,NDUFA13,SAMM50,SLC25A6,TIMM17A,TIMM23B,TIMM8B,TOMM20
dicarboxylic acid metabolic process	10	8.15e-08	ACLY,ALDH18A1,DLD,FH,GLUD1,IDH2,MDH2,OGDH,SDHA,SUCLG2
nicotinamide nucleotide metabolic process	10	1.83e-07	DLD,GPD2,IDH2,MDH2,MPC1,NNT,OGDH,PDHA1,PDHB,PRDX5
proton transmembrane transport	10	1.49e-06	ATP5A1,ATP5B,ATP5C1,ATP5D,ATP5H,COX6B1,LETM1,MT-CO2,NDUFA4,NNT
carboxylic acid catabolic process	10	0.00012	BCKDK,ETFA,ETFB,ETFDH,GCAT,GLUD1,HADH,IVD,PCCB,TXN2
cristae formation	9	2.03e-10	ATP5A1,ATP5B,ATP5C1,ATP5D,ATP5H,CHCHD3,IMMT,LETM1,SAMM50
mitochondrial ATP synthesis coupled electron transport	9	1.92e-07	DLD,MT-CO2,NDUFA12,NDUFA4,NDUFS2,NDUFV1,NDUFV2,SDHA,UQCRQ
protein import	9	2.54e-05	GRPEL1,HSPD1,NDUFA13,PHB2,RPL23,SAMM50,TIMM17A,TIMM23B,TOMM20
regulation of intrinsic apoptotic signaling pathway	9	3.95e-05	DNAJA1,GNB2L1,HNRNPK,HYOU1,NDUFA13,OPA1,P4HB,PARP1,TRAP1
cofactor biosynthetic process	9	0.00037	ACLY,DLD,IDH2,MAOB,MPC1,NFS1,OGDH,PDHA1,PDHB
response to endoplasmic reticulum stress	9	0.00071	AIFM1,CALR,HSP90B1,HSPA5,HYOU1,P4HB,PDIA3,TMTC3,VAPB
fatty acid metabolic process	9	0.0025	ACLY,DLD,ETFA,ETFB,ETFDH,HADH,IVD,PCCB,SCARB2
response to antibiotic	9	0.0032	AIFM1,EEF1B2,HSPA5,MAOB,OPA1,PRDX3,RPL10A,RPL23,TUFM
response to oxidative stress	9	0.0106	AIFM1,ETFDH,NDUFA12,NDUFS2,PARP1,PRDX3,PRDX5,ROMO1,TXN2
response to toxic substance	9	0.037	AIFM1,EEF1B2,MAOB,NNT,PRDX3,PRDX4,PRDX5,RPL10A,TUFM
cell redox homeostasis	8	1.1e-06	DLD,NNT,P4HB,PDIA3,PRDX3,PRDX4,PRDX5,TXN2
mitochondrial respiratory chain complex assembly	8	1.2e-05	AIFM1,COA3,NDUFA12,NDUFA13,NDUFS2,NDUFV1,NDUFV2,SAMM50
coenzyme biosynthetic process	8	0.00038	ACLY,DLD,IDH2,MPC1,NFS1,OGDH,PDHA1,PDHB
ribosome biogenesis	8	0.0063	RPL10A,RPL34,RPL5,RPL6,RPS14,RPS16,RPS18,RPS8
response to decreased oxygen levels	8	0.0104	AIFM1,GNB1,HSP90B1,HYOU1,OPA1,P4HB,PHB2,TXN2
acyl-CoA metabolic process	7	6.52e-05	ACLY,DLD,MPC1,OGDH,PDHA1,PDHB,SUCLG2
translational elongation	7	0.00031	EEF1B2,EEF1G,GNB2L1,MRPL12,MRPL48,RPLP2,TUFM
response to unfolded protein	7	0.0013	CALR,DNAJA1,HSP90B1,HSPA5,HSPD1,HYOU1,VAPB
alpha-amino acid metabolic process	7	0.0066	ALDH18A1,GCAT,GLUD1,IVD,OAT,P4HB,PRDX4
response to alcohol	7	0.0109	AIFM1,EEF1B2,GNB1,MAOB,PARP1,RPL10A,TUFM
response to hypoxia	7	0.0291	GNB1,HSP90B1,HYOU1,OPA1,P4HB,PHB2,TXN2
response to acid chemical	7	0.0497	AIFM1,GDAP1,GNB1,NDUFA13,OPA1,PHB2,TOMM20
protein transmembrane import into intracellular organelle	6	9.65e-06	GRPEL1,HSPD1,NDUFA13,TIMM17A,TIMM23B,TOMM20
intracellular protein transmembrane transport	6	3.44e-05	GRPEL1,HSPD1,NDUFA13,TIMM17A,TIMM23B,TOMM20
mitochondrial respiratory chain complex I assembly	6	0.00014	AIFM1,NDUFA12,NDUFA13,NDUFS2,NDUFV1,NDUFV2
pyruvate metabolic process	6	0.00015	DLD,MPC1,OGDH,PC,PDHA1,PDHB
ATP hydrolysis coupled cation transmembrane transport	6	0.00015	ATP13A1,ATP5A1,ATP5B,ATP5C1,ATP5D,ATP5H
ATP biosynthetic process	6	0.00028	ATP5A1,ATP5B,ATP5C1,ATP5D,ATP5H,OGDH
fatty acid catabolic process	6	0.00048	ETFA,ETFB,ETFDH,HADH,IVD,PCCB
purine ribonucleoside monophosphate biosynthetic process	6	0.00098	ATP5A1,ATP5B,ATP5C1,ATP5D,ATP5H,OGDH
reactive oxygen species metabolic process	6	0.0012	MAOB,NDUFA13,NNT,PRDX3,PRDX4,PRDX5
glucose metabolic process	6	0.0019	GPD2,MDH2,PC,PCK2,PDHA1,PDHB
cellular response to decreased oxygen levels	6	0.0064	AIFM1,GNB1,HYOU1,OPA1,P4HB,PHB2
protein stabilization	6	0.0102	CALR,HSPD1,PHB2,PPIB,RPL23,RPL5
response to ketone	6	0.015	AIFM1,CALR,GNB1,MAOB,OPA1,PARP1
cellular response to nutrient levels	6	0.0243	AIFM1,GDAP1,HSP90B1,HSPA5,OPA1,TXN2
regulation of cysteine-type endopeptidase activity involved in apoptotic process	6	0.0255	AIFM1,GNB2L1,HSPD1,NDUFA13,PRDX3,PRDX5
negative regulation of apoptotic signaling pathway	6	0.0307	DNAJA1,HYOU1,NDUFA13,OPA1,SLC25A5,TRAP1
acetyl-CoA biosynthetic process	5	2.4e-06	ACLY,DLD,MPC1,PDHA1,PDHB
mitochondrial ATP synthesis coupled proton transport	5	6.46e-06	ATP5A1,ATP5B,ATP5C1,ATP5D,ATP5H
acetyl-CoA metabolic process	5	4.08e-05	ACLY,DLD,MPC1,PDHA1,PDHB
mitochondrial electron transport, NADH to ubiquinone	5	0.00029	DLD,NDUFA4,NDUFS2,NDUFV1,NDUFV2
fatty acid beta-oxidation	5	0.00079	ETFA,ETFB,ETFDH,HADH,IVD
cytoplasmic translation	5	0.00083	RPL10A,RPL4,RPL6,RPL8,RPLP2
chaperone-mediated protein folding	5	0.0012	CALR,FKBP2,HSPD1,PPIB,TRAP1
ATP hydrolysis coupled ion transmembrane transport	5	0.0012	ATP13A1,ATP5A1,ATP5B,ATP5C1,ATP5D
negative regulation of intrinsic apoptotic signaling pathway	5	0.0062	DNAJA1,HYOU1,NDUFA13,OPA1,TRAP1
endoplasmic reticulum unfolded protein response	5	0.008	CALR,HSP90B1,HSPA5,HYOU1,VAPB
cellular amino acid catabolic process	5	0.0112	BCKDK,GCAT,GLUD1,IVD,TXN2
cellular response to hypoxia	5	0.0225	GNB1,HYOU1,OPA1,P4HB,PHB2
mitochondrial acetyl-CoA biosynthetic process from pyruvate	4	8.16e-06	DLD,MPC1,PDHA1,PDHB
protein folding in endoplasmic reticulum	4	9.54e-05	CALR,HSP90B1,HSPA5,PDIA3
fatty acid beta-oxidation using acyl-CoA dehydrogenase	4	0.00012	ETFA,ETFB,ETFDH,IVD
protein import into mitochondrial matrix	4	0.00017	GRPEL1,TIMM17A,TIMM23B,TOMM20
negative regulation of response to endoplasmic reticulum stress	4	0.0033	GNB2L1,HSPA5,HYOU1,OPA1
gluconeogenesis	4	0.0038	GPD2,MDH2,PC,PCK2
positive regulation of viral life cycle	4	0.0083	P4HB,PC,PPIB,VAPB
response to activity	4	0.0099	HADH,OPA1,SLC25A25,TOMM20
regulation of oxidative stress-induced cell death	4	0.0108	GNB2L1,P4HB,PARP1,TRAP1
regulation of mitochondrial membrane potential	4	0.012	GNB2L1,NNT,PARP1,PRDX3
interaction with symbiont	4	0.0161	HSPD1,PC,PPIB,VAPB
cellular oxidant detoxification	4	0.0243	NNT,PRDX3,PRDX4,PRDX5
modification of morphology or physiology of other organism involved in symbiotic interaction	4	0.0477	PC,PPIB,SLC25A6,VAPB
adenine transport	3	0.00016	SLC25A5,SLC25A6,VDAC3
ADP transport	3	0.00084	SLC25A25,SLC25A5,SLC25A6
ATF6-mediated unfolded protein response	3	0.00084	CALR,HSP90B1,HSPA5
ATP transport	3	0.0012	SLC25A25,SLC25A5,SLC25A6
positive regulation by host of viral process	3	0.0022	PC,PPIB,VAPB
mitochondrial fusion	3	0.0029	CHCHD3,GDAP1,OPA1
nucleotide transmembrane transport	3	0.0034	SLC25A25,SLC25A5,SLC25A6
2-oxoglutarate metabolic process	3	0.0039	DLD,IDH2,OGDH
glutamine family amino acid biosynthetic process	3	0.0039	ALDH18A1,GLUD1,OAT
mitochondrial calcium ion transmembrane transport	3	0.0056	LETM1,OPA1,PHB2
response to mineralocorticoid	3	0.0111	AIFM1,MAOB,PARP1
NADP metabolic process	3	0.0119	IDH2,NNT,PRDX5
regulation of oxidative stress-induced intrinsic apoptotic signaling pathway	3	0.0119	P4HB,PARP1,TRAP1
hydrogen peroxide metabolic process	3	0.0128	MAOB,PRDX3,PRDX5
NADH metabolic process	3	0.0158	GPD2,MDH2,OGDH
maturation of SSU-rRNA from tricistronic rRNA transcript (SSU-rRNA, 5.8S rRNA, LSU-rRNA)	3	0.0182	RPS14,RPS16,RPS8
cerebellar cortex development	3	0.0368	HSPA5,OGDH,UQCRQ
peptidyl-proline modification	3	0.049	FKBP2,P4HB,PPIB
STRING COMPONENT
Term description	Counts	FDR	Gene
cytoplasmic part	131	8.75e-36	ACLY,AIFM1,ALDH18A1,ATP13A1,ATP5A1,ATP5B,ATP5C1,ATP5D,ATP5H,BCKDK,CALR,CHCHD3,CISD1,CLPX,CNPY2,COA3,COX6B1,CS,DHRS4,DLD,DNAJA1,EEF1B2,EEF1G,ESYT1,ETFA,ETFB,ETFDH,FH,FKBP2,GANAB,GCAT,GDAP1,GLUD1,GNB1,GNB2L1,GPD2,GRPEL1,HADH,HNRNPK,HSP90B1,HSPA5,HSPA9,HSPD1,HYOU1,IDH2,IDH3A,IDH3B,IMMT,IVD,LETM1,MAOB,MDH2,MINOS1,MLEC,MPC1,MRPL12,MRPL48,MT-CO2,MYL6,NDUFA12,NDUFA13,NDUFA4,NDUFS2,NDUFV1,NDUFV2,NFS1,NNT…
organelle	129	1.92e-18	ACLY,AIFM1,ALDH18A1,ATP13A1,ATP5A1,ATP5B,ATP5C1,ATP5D,ATP5H,BCKDK,CALR,CHCHD3,CISD1,CLPX,CNPY2,COA3,COX6B1,CS,DHRS4,DLD,DNAJA1,ESYT1,ETFA,ETFB,ETFDH,FH,FKBP2,GANAB,GCAT,GDAP1,GLUD1,GNB1,GNB2L1,GPD2,GRPEL1,HADH,HNRNPK,HSP90B1,HSPA5,HSPA9,HSPD1,HYOU1,IDH2,IDH3A,IDH3B,IMMT,IVD,LETM1,MAOB,MDH2,MINOS1,MLEC,MPC1,MRPL12,MRPL48,MT-CO2,MYL6,NDUFA12,NDUFA13,NDUFA4,NDUFS2,NDUFV1,NDUFV2,NFS1,NNT,OAT,OCIAD2,O…
intracellular organelle	128	2.32e-18	ACLY,AIFM1,ALDH18A1,ATP13A1,ATP5A1,ATP5B,ATP5C1,ATP5D,ATP5H,BCKDK,CALR,CHCHD3,CISD1,CLPX,CNPY2,COA3,COX6B1,CS,DHRS4,DLD,DNAJA1,ESYT1,ETFA,ETFB,ETFDH,FH,FKBP2,GANAB,GCAT,GDAP1,GLUD1,GNB2L1,GPD2,GRPEL1,HADH,HNRNPK,HSP90B1,HSPA5,HSPA9,HSPD1,HYOU1,IDH2,IDH3A,IDH3B,IMMT,IVD,LETM1,MAOB,MDH2,MINOS1,MLEC,MPC1,MRPL12,MRPL48,MT-CO2,MYL6,NDUFA12,NDUFA13,NDUFA4,NDUFS2,NDUFV1,NDUFV2,NFS1,NNT,OAT,OCIAD2,OGDH,O…
membrane-bounded organelle	125	2.87e-19	ACLY,AIFM1,ALDH18A1,ATP13A1,ATP5A1,ATP5B,ATP5C1,ATP5D,ATP5H,BCKDK,CALR,CHCHD3,CISD1,CLPX,CNPY2,COA3,COX6B1,CS,DHRS4,DLD,DNAJA1,ESYT1,ETFA,ETFB,ETFDH,FH,FKBP2,GANAB,GCAT,GDAP1,GLUD1,GNB1,GNB2L1,GPD2,GRPEL1,HADH,HNRNPK,HSP90B1,HSPA5,HSPA9,HSPD1,HYOU1,IDH2,IDH3A,IDH3B,IMMT,IVD,LETM1,MAOB,MDH2,MINOS1,MLEC,MPC1,MRPL12,MRPL48,MT-CO2,NDUFA12,NDUFA13,NDUFA4,NDUFS2,NDUFV1,NDUFV2,NFS1,NNT,OAT,OCIAD2,OGDH,O…
organelle part	124	1.87e-28	ACLY,AIFM1,ALDH18A1,ATP13A1,ATP5A1,ATP5B,ATP5C1,ATP5D,ATP5H,BCKDK,CALR,CHCHD3,CISD1,CLPX,COA3,COX6B1,CS,DHRS4,DLD,DNAJA1,ESYT1,ETFA,ETFB,ETFDH,FH,FKBP2,GANAB,GCAT,GDAP1,GLUD1,GNB1,GNB2L1,GPD2,GRPEL1,HADH,HNRNPK,HSP90B1,HSPA5,HSPA9,HSPD1,HYOU1,IDH2,IDH3A,IDH3B,IMMT,IVD,LETM1,MAOB,MDH2,MINOS1,MLEC,MPC1,MRPL12,MRPL48,MT-CO2,MYL6,NDUFA12,NDUFA13,NDUFA4,NDUFS2,NDUFV1,NDUFV2,NFS1,NNT,OAT,OGDH,OPA1,P4HB…
intracellular organelle part	123	1.58e-28	ACLY,AIFM1,ALDH18A1,ATP13A1,ATP5A1,ATP5B,ATP5C1,ATP5D,ATP5H,BCKDK,CALR,CHCHD3,CISD1,CLPX,COA3,COX6B1,CS,DHRS4,DLD,DNAJA1,ESYT1,ETFA,ETFB,ETFDH,FH,FKBP2,GANAB,GCAT,GDAP1,GLUD1,GNB2L1,GPD2,GRPEL1,HADH,HNRNPK,HSP90B1,HSPA5,HSPA9,HSPD1,HYOU1,IDH2,IDH3A,IDH3B,IMMT,IVD,LETM1,MAOB,MDH2,MINOS1,MLEC,MPC1,MRPL12,MRPL48,MT-CO2,MYL6,NDUFA12,NDUFA13,NDUFA4,NDUFS2,NDUFV1,NDUFV2,NFS1,NNT,OAT,OGDH,OPA1,P4HB,PARP…
intracellular membrane-bounded organelle	123	3.49e-21	ACLY,AIFM1,ALDH18A1,ATP13A1,ATP5A1,ATP5B,ATP5C1,ATP5D,ATP5H,BCKDK,CALR,CHCHD3,CISD1,CLPX,CNPY2,COA3,COX6B1,CS,DHRS4,DLD,DNAJA1,ESYT1,ETFA,ETFB,ETFDH,FH,FKBP2,GANAB,GCAT,GDAP1,GLUD1,GNB2L1,GPD2,GRPEL1,HADH,HNRNPK,HSP90B1,HSPA5,HSPA9,HSPD1,HYOU1,IDH2,IDH3A,IDH3B,IMMT,IVD,LETM1,MAOB,MDH2,MINOS1,MLEC,MPC1,MRPL12,MRPL48,MT-CO2,NDUFA12,NDUFA13,NDUFA4,NDUFS2,NDUFV1,NDUFV2,NFS1,NNT,OAT,OGDH,OPA1,P4HB,PAR…
mitochondrion	86	1.22e-57	AIFM1,ALDH18A1,ATP5A1,ATP5B,ATP5C1,ATP5D,ATP5H,BCKDK,CHCHD3,CISD1,CLPX,COA3,COX6B1,CS,DHRS4,DLD,DNAJA1,ETFA,ETFB,ETFDH,FH,GCAT,GDAP1,GLUD1,GNB2L1,GPD2,GRPEL1,HADH,HSPA5,HSPA9,HSPD1,IDH2,IDH3A,IDH3B,IMMT,IVD,LETM1,MAOB,MDH2,MINOS1,MPC1,MRPL12,MRPL48,MT-CO2,NDUFA12,NDUFA13,NDUFA4,NDUFS2,NDUFV1,NDUFV2,NFS1,NNT,OAT,OGDH,OPA1,PARP1,PC,PCCB,PCK2,PDHA1,PDHB,PGAM5,PHB2,PRDX3,PRDX5,ROMO1,SAMM50,SDHA,SFXN3…
mitochondrial part	81	2.3e-64	AIFM1,ALDH18A1,ATP5A1,ATP5B,ATP5C1,ATP5D,ATP5H,BCKDK,CHCHD3,CISD1,CLPX,COA3,COX6B1,CS,DLD,ETFA,ETFB,ETFDH,FH,GCAT,GDAP1,GLUD1,GPD2,GRPEL1,HADH,HSPA9,HSPD1,IDH2,IDH3A,IDH3B,IMMT,IVD,LETM1,MAOB,MDH2,MINOS1,MPC1,MRPL12,MRPL48,MT-CO2,NDUFA12,NDUFA13,NDUFA4,NDUFS2,NDUFV1,NDUFV2,NFS1,NNT,OAT,OGDH,OPA1,PC,PCCB,PCK2,PDHA1,PDHB,PGAM5,PHB2,PRDX3,PRDX5,ROMO1,SAMM50,SDHA,SFXN3,SLC25A25,SLC25A5,SLC25A6,SUCLG1…
membrane	80	0.00037	ACLY,AIFM1,ALDH18A1,ATP13A1,ATP5A1,ATP5B,ATP5C1,ATP5D,ATP5H,CALR,CHCHD3,CISD1,CLPX,COA3,COX6B1,DHRS4,DNAJA1,ESYT1,ETFDH,FKBP2,GCAT,GDAP1,GNB1,GNB2L1,GPD2,GRPEL1,HSP90B1,HSPA5,HSPD1,IMMT,LETM1,MAOB,MDH2,MINOS1,MLEC,MPC1,MRPL12,MRPL48,MT-CO2,NDUFA12,NDUFA13,NDUFA4,NDUFS2,NDUFV1,NDUFV2,NNT,OGDH,OPA1,P4HB,PDIA3,PGAM5,PHB2,RAB10,RAB3D,ROMO1,RPN2,RRBP1,SAMM50,SCARB2,SDHA,SFXN3,SLC25A25,SLC25A5,SLC25A6,…
intracellular organelle lumen	78	1.45e-13	ACLY,AIFM1,ATP5A1,ATP5B,ATP5C1,ATP5D,ATP5H,BCKDK,CALR,CLPX,COX6B1,CS,DHRS4,DLD,ETFA,ETFB,ETFDH,FH,GANAB,GCAT,GLUD1,GNB2L1,GRPEL1,HADH,HNRNPK,HSP90B1,HSPA5,HSPA9,HSPD1,HYOU1,IDH2,IDH3A,IDH3B,IVD,MDH2,MRPL12,MRPL48,NDUFA13,NDUFS2,NFS1,OAT,OGDH,OPA1,P4HB,PARP1,PC,PCCB,PCK2,PDHA1,PDHB,PDIA3,PHB2,PPIB,PRDX3,PRDX4,PRDX5,RARS,RPL13,RPL23,RPL5,RPS14,RPS15A,RPS16,RPS18,RPS8,SCARB2,SDHA,SLC25A5,SUCLG1,SUCL…
protein-containing complex	76	3.27e-14	ACLY,ATP5A1,ATP5B,ATP5C1,ATP5D,ATP5H,BCKDK,CALR,CHCHD3,CLPX,DLD,EEF1B2,ETFDH,FH,GANAB,GNB1,GNB2L1,GPD2,GRPEL1,HNRNPK,HSP90B1,HSPA5,HSPD1,HYOU1,IMMT,MINOS1,MRPL12,MRPL48,MT-CO2,MYL6,NDUFA12,NDUFA13,NDUFA4,NDUFS2,NDUFV1,NDUFV2,OGDH,P4HB,PARP1,PDHA1,PDHB,PHB2,PPIB,PRDX3,RARS,RPL10A,RPL13,RPL23,RPL4,RPL5,RPL6,RPL8,RPLP2,RPN2,RPS14,RPS15A,RPS16,RPS18,RPS8,RRBP1,SAMM50,SDHA,SLC25A5,SLC25A6,SUCLG2,TIMM1…
membrane part	62	0.0053	ATP13A1,ATP5A1,ATP5B,ATP5C1,ATP5D,ATP5H,CALR,CHCHD3,CISD1,COA3,DHRS4,DNAJA1,ESYT1,ETFDH,FKBP2,GDAP1,GNB1,GNB2L1,GRPEL1,HSP90B1,HSPA5,HSPD1,IMMT,LETM1,MAOB,MINOS1,MLEC,MPC1,MT-CO2,NDUFA12,NDUFA13,NDUFA4,NDUFS2,NDUFV1,NDUFV2,NNT,OPA1,P4HB,PGAM5,RAB10,ROMO1,RPN2,RRBP1,SAMM50,SCARB2,SDHA,SFXN3,SLC25A25,SLC25A5,SLC25A6,TIMM17A,TIMM23B,TMED10,TMEM65,TMTC3,TOMM20,TUBB,UQCRQ,USMG5,VAPB,VDAC1,VDAC3
organelle envelope	57	2.37e-32	AIFM1,ALDH18A1,ATP5A1,ATP5B,ATP5C1,ATP5D,ATP5H,CALR,CHCHD3,CISD1,CLPX,COA3,COX6B1,ETFDH,GCAT,GDAP1,GPD2,GRPEL1,HSPD1,IMMT,LETM1,MAOB,MINOS1,MPC1,MRPL12,MRPL48,MT-CO2,NDUFA12,NDUFA13,NDUFA4,NDUFS2,NDUFV1,NDUFV2,NNT,OGDH,OPA1,PARP1,PGAM5,PHB2,ROMO1,SAMM50,SDHA,SFXN3,SLC25A25,SLC25A5,SLC25A6,TIMM17A,TIMM23B,TIMM8B,TMEM65,TOMM20,TRAP1,TUBB,UQCRQ,USMG5,VDAC1,VDAC3
mitochondrial membrane	54	8.25e-40	AIFM1,ALDH18A1,ATP5A1,ATP5B,ATP5C1,ATP5D,ATP5H,CHCHD3,CISD1,CLPX,COA3,COX6B1,ETFDH,GCAT,GDAP1,GPD2,GRPEL1,HSPD1,IMMT,LETM1,MAOB,MINOS1,MPC1,MRPL12,MRPL48,MT-CO2,NDUFA12,NDUFA13,NDUFA4,NDUFS2,NDUFV1,NDUFV2,NNT,OGDH,OPA1,PGAM5,PHB2,ROMO1,SAMM50,SDHA,SFXN3,SLC25A25,SLC25A5,SLC25A6,TIMM17A,TIMM23B,TIMM8B,TMEM65,TOMM20,TRAP1,UQCRQ,USMG5,VDAC1,VDAC3
mitochondrial inner membrane	44	3.43e-35	AIFM1,ALDH18A1,ATP5A1,ATP5B,ATP5C1,ATP5D,ATP5H,CHCHD3,CLPX,COA3,COX6B1,ETFDH,GCAT,GPD2,GRPEL1,HSPD1,IMMT,LETM1,MINOS1,MPC1,MRPL12,MRPL48,MT-CO2,NDUFA12,NDUFA13,NDUFA4,NDUFS2,NDUFV1,NDUFV2,NNT,OPA1,PHB2,ROMO1,SDHA,SLC25A25,SLC25A5,SLC25A6,TIMM17A,TIMM23B,TIMM8B,TMEM65,TRAP1,UQCRQ,USMG5
mitochondrial matrix	42	1.54e-32	ATP5A1,ATP5B,ATP5C1,ATP5D,BCKDK,CLPX,CS,DLD,ETFA,ETFB,ETFDH,FH,GLUD1,GRPEL1,HADH,HSPA9,HSPD1,IDH2,IDH3A,IDH3B,IVD,MDH2,MRPL12,MRPL48,NDUFS2,NFS1,OAT,OGDH,PC,PCCB,PCK2,PDHA1,PDHB,PRDX3,PRDX5,SLC25A5,SUCLG1,SUCLG2,TRAP1,TUFM,TXN2,VDAC1
mitochondrial protein complex	32	1.24e-28	ATP5A1,ATP5B,ATP5C1,ATP5D,ATP5H,BCKDK,CHCHD3,CLPX,ETFDH,GRPEL1,IMMT,MINOS1,MRPL12,MRPL48,MT-CO2,NDUFA12,NDUFA13,NDUFA4,NDUFS2,NDUFV1,NDUFV2,SAMM50,SDHA,SLC25A6,SUCLG2,TIMM17A,TIMM23B,TIMM8B,TOMM20,UQCRQ,USMG5,VDAC1
membrane protein complex	31	6.1e-11	ATP5A1,ATP5B,ATP5C1,ATP5D,ATP5H,CALR,CHCHD3,GNB1,GRPEL1,HSPD1,IMMT,MINOS1,MT-CO2,NDUFA12,NDUFA13,NDUFA4,NDUFS2,NDUFV1,NDUFV2,RPN2,SAMM50,SDHA,SLC25A6,TIMM17A,TIMM23B,TMED10,TOMM20,UQCRQ,USMG5,VDAC1,VDAC3
mitochondrial membrane part	30	1.58e-28	ATP5A1,ATP5B,ATP5C1,ATP5D,ATP5H,CHCHD3,COA3,ETFDH,GDAP1,GRPEL1,IMMT,MINOS1,MPC1,MT-CO2,NDUFA12,NDUFA13,NDUFA4,NDUFS2,NDUFV1,NDUFV2,NNT,OPA1,SAMM50,SDHA,SLC25A6,TIMM17A,TIMM23B,TOMM20,UQCRQ,USMG5
endoplasmic reticulum	29	6e-05	ATP13A1,CALR,CNPY2,DHRS4,DNAJA1,ESYT1,FKBP2,GANAB,HSP90B1,HSPA5,HYOU1,MLEC,P4HB,PDIA3,PPIB,PRDX4,RAB10,RPL13,RPL34,RPL4,RPL5,RPL6,RPN2,RPS8,RRBP1,SCARB2,TMED10,TMTC3,VAPB
inner mitochondrial membrane protein complex	22	4.78e-22	ATP5A1,ATP5B,ATP5C1,ATP5D,ATP5H,CHCHD3,GRPEL1,IMMT,MINOS1,MT-CO2,NDUFA12,NDUFA13,NDUFA4,NDUFS2,NDUFV1,NDUFV2,SDHA,SLC25A6,TIMM17A,TIMM23B,UQCRQ,USMG5
catalytic complex	21	0.00097	BCKDK,DLD,ETFDH,GNB1,GPD2,HNRNPK,NDUFA12,NDUFA13,NDUFA4,NDUFS2,NDUFV1,NDUFV2,OGDH,P4HB,PDHA1,PDHB,RPN2,SDHA,SUCLG2,UBE2N,UQCRQ
ribonucleoprotein complex	20	2.77e-06	CALR,GNB2L1,HNRNPK,MRPL12,MRPL48,RPL10A,RPL13,RPL23,RPL4,RPL5,RPL6,RPL8,RPLP2,RPS14,RPS15A,RPS16,RPS18,RPS8,RRBP1,TUBB
endoplasmic reticulum part	20	0.0025	ATP13A1,CALR,DHRS4,DNAJA1,ESYT1,FKBP2,GANAB,HSP90B1,HSPA5,HYOU1,MLEC,P4HB,PDIA3,PPIB,RAB10,RPN2,RRBP1,SCARB2,TMED10,VAPB
whole membrane	20	0.0181	CALR,CISD1,GDAP1,MAOB,MLEC,OPA1,PDIA3,PGAM5,PHB2,RAB10,RAB3D,RPN2,SAMM50,SCARB2,SLC25A5,TMED10,TOMM20,TUBB,VDAC1,VDAC3
myelin sheath	18	2.75e-15	ATP5A1,ATP5B,ATP5C1,ATP5H,DLD,GNB1,HSPA5,HSPA9,IDH3A,IMMT,MDH2,NDUFV2,PDHA1,PDIA3,PRDX3,SDHA,SLC25A5,TUFM
oxidoreductase complex	16	1.95e-15	BCKDK,DLD,ETFDH,GPD2,NDUFA12,NDUFA13,NDUFA4,NDUFS2,NDUFV1,NDUFV2,OGDH,P4HB,PDHA1,PDHB,SDHA,UQCRQ
ribosome	15	2.35e-10	GNB2L1,MRPL12,MRPL48,RPL10A,RPL13,RPL23,RPL6,RPL8,RPLP2,RPS14,RPS15A,RPS16,RPS18,RPS8,RRBP1
endoplasmic reticulum membrane	15	0.0178	ATP13A1,CALR,DHRS4,DNAJA1,ESYT1,FKBP2,HSP90B1,HSPA5,MLEC,RAB10,RPN2,RRBP1,SCARB2,TMED10,VAPB
endoplasmic reticulum subcompartment	15	0.0181	ATP13A1,CALR,DHRS4,DNAJA1,ESYT1,FKBP2,HSP90B1,HSPA5,MLEC,RAB10,RPN2,RRBP1,SCARB2,TMED10,VAPB
integral component of organelle membrane	14	3.71e-07	CALR,CHCHD3,COA3,ESYT1,ETFDH,GDAP1,HSPA5,IMMT,MINOS1,MPC1,RRBP1,TIMM17A,TIMM23B,TOMM20
ribosomal subunit	12	1.17e-08	GNB2L1,MRPL12,MRPL48,RPL10A,RPL6,RPL8,RPLP2,RPS14,RPS15A,RPS16,RPS18,RPS8
integral component of mitochondrial membrane	10	1.21e-09	CHCHD3,COA3,ETFDH,GDAP1,IMMT,MINOS1,MPC1,TIMM17A,TIMM23B,TOMM20
cytosolic ribosome	10	4.4e-09	RPL10A,RPL13,RPL6,RPL8,RPLP2,RPS14,RPS15A,RPS16,RPS18,RPS8
mitochondrial respirasome	10	8.69e-09	MT-CO2,NDUFA12,NDUFA13,NDUFA4,NDUFS2,NDUFV1,NDUFV2,NNT,SDHA,UQCRQ
mitochondrial outer membrane	10	5.04e-06	CISD1,GDAP1,MAOB,OPA1,PGAM5,PHB2,SAMM50,TOMM20,VDAC1,VDAC3
respiratory chain complex	9	7.42e-08	MT-CO2,NDUFA12,NDUFA13,NDUFA4,NDUFS2,NDUFV1,NDUFV2,SDHA,UQCRQ
integral component of mitochondrial inner membrane	8	5.26e-09	CHCHD3,COA3,ETFDH,IMMT,MINOS1,MPC1,TIMM17A,TIMM23B
endoplasmic reticulum lumen	8	0.0052	CALR,GANAB,HSP90B1,HSPA5,HYOU1,P4HB,PDIA3,PPIB
melanosome	7	6e-05	GANAB,HSP90B1,HSPA5,P4HB,PDIA3,PPIB,TMED10
mitochondrial proton-transporting ATP synthase complex	6	1.95e-07	ATP5A1,ATP5B,ATP5C1,ATP5D,ATP5H,USMG5
mitochondrial nucleoid	6	6.44e-06	ATP5B,CLPX,HSPA9,SLC25A5,TUFM,VDAC1
mitochondrial respiratory chain complex I	6	8.88e-06	NDUFA12,NDUFA13,NDUFA4,NDUFS2,NDUFV1,NDUFV2
small ribosomal subunit	6	5.23e-05	GNB2L1,RPS14,RPS15A,RPS16,RPS18,RPS8
large ribosomal subunit	6	0.0002	MRPL12,MRPL48,RPL10A,RPL6,RPL8,RPLP2
organelle envelope lumen	6	0.0002	AIFM1,COX6B1,OPA1,TIMM8B,TRAP1,TUBB
endoplasmic reticulum chaperone complex	5	4.34e-07	HSP90B1,HSPA5,HYOU1,P4HB,PPIB
tricarboxylic acid cycle enzyme complex	5	5.73e-07	BCKDK,DLD,FH,OGDH,SUCLG2
smooth endoplasmic reticulum	5	2.39e-05	CALR,HSPA5,HYOU1,PPIB,PRDX4
cytosolic small ribosomal subunit	5	5.68e-05	RPS14,RPS15A,RPS16,RPS18,RPS8
mitochondrial intermembrane space	5	0.0012	AIFM1,COX6B1,OPA1,TIMM8B,TRAP1
proton-transporting ATP synthase complex, catalytic core F(1)	4	2.86e-06	ATP5A1,ATP5B,ATP5C1,ATP5D
TIM23 mitochondrial import inner membrane translocase complex	4	1.49e-05	GRPEL1,SLC25A6,TIMM17A,TIMM23B
cytosolic large ribosomal subunit	4	0.00046	RPL10A,RPL6,RPL8,RPLP2
polysome	4	0.0054	CALR,RPL10A,RPL6,RPL8
endoplasmic reticulum-Golgi intermediate compartment	4	0.0298	CALR,HSPA5,P4HB,TMED10
mitochondrial proton-transporting ATP synthase complex, catalytic core F(1)	3	8.38e-05	ATP5B,ATP5C1,ATP5D
MICOS complex	3	0.00018	CHCHD3,IMMT,MINOS1
pyruvate dehydrogenase complex	3	0.00023	DLD,PDHA1,PDHB
dihydrolipoyl dehydrogenase complex	3	0.00038	BCKDK,DLD,OGDH
endocytic vesicle lumen	3	0.0019	CALR,HSP90B1,HYOU1
polysomal ribosome	3	0.0058	RPL10A,RPL6,RPL8
cytochrome complex	3	0.0074	MT-CO2,NDUFA4,UQCRQ
